# Supplementary material for: Neuropeptides and G-Protein Coupled Receptors (GPCRs) in the Red Palm Weevil Rhynchophorus ferrugineus Olivier (Coleoptera: Dryophthoridae)
Source: Front Physiol. 2020 Feb 28;11:159. doi: 10.3389/fphys.2020.00159 (PMC7058690; doi:10.3389/fphys.2020.00159)
Supplement: TABLE S1 — List of neuropeptide genes of red palm weevil. [file Table_1.xlsx]

## Sheet: Supplementary Table 1
Table S1: List of neuropeptide genes of red palm weevil
Name	Accession No.	mRNA	Protein
Allatostatin B	MK751535	ATGACGATGATGGGTCAAAATAGATCGTCGCCGATCGGCAAGGCGAGGGGATGCGTCCTGTACGCGATGGCGTTGATTTTCTGCCTCGAACTGTTGGGATTAGCCGCGGCAGCGGGCGACATGACGTCGACGAAAACTTTGGAGGAGAATCCGGAGGCGGATTATTCCAAGAGAGGATGGAAGACTGACCTACCCATGTGGGGTAAAAGGGCCTGGAGCAATCTGCACTCGGGCTGGGGCAAGAGGGACCTGATGACGTCAGAGGAGGACTCGAACTACGCCGTGCCATTGTACGAGAAAAGGGCCTGGCAACGATTACAGGGTGGCTGGGGGAAACGGTTCATACCCTCCGAAGAGGACATCATGATCCGTCAACTCGCCGCCGCCCTAGAGGAAAAC…	MTMMGQNRSSPIGKARGCVLYAMALIFCLELLGLAAAAGDMTSTKTLEENPEADYSKRGWKTDLPMWGKRAWSNLHSGWGKRDLMTSEEDSNYAVPLYEKRAWQRLQGGWGKRFIPSEEDIMIRQLAAALEENEPENDLGYYPEREIDAHEMDKRNWNKFTDGWGKRSEKWEKFKGSWGKREPAWNNLKGLWGKRSVSE
Allatostatin C	MK751536	ATGCAATACACTGTCTCCCAGACCATCGTTCGATTCTTCATCACTTTCTTCGTTTTAACATTAGTTGCTGCTAATGCCAAGCCACCTCACTTTGCCGAAAATAGCGCAGTTTATAGTGATCAAGAATCCACTGGAAATAATTTGATTGATACCGGTCTCAGGCCATGGCAATTAGAATTACTTGCTCAGAGAATGGCTGAACTAAATCAATTTGGGCAACTCAACAGTATGGCCGGACAGGAATATGGAACCTTTGATCGAGCTTTGAGAAGTGGTAATGAAATTAAGCGCCAGAGCCGTTACCGCCTTTGCTACTTCAATCCCGTGTCCTGCTTCAGGAAATAA	MQYTVSQTIVRFFITFFVLTLVAANAKPPHFAENSAVYSDQESTGNNLIDTGLRPWQLELLAQRMAELNQFGQLNSMAGQEYGTFDRALRSGNEIKRQSRYRLCYFNPVSCFRK
Allatostatin CC	MK751537	ATGAGGACCCGGACTATCAAACGAACATCAGATATGATGAATATCCGATGGTTGTACCAAAGAAGCGTACAGCGCTTTTGGTGAATCGTTTAATGGTTGCTTTGAAGGATGCCCTTGAAGAAGACGAACGAGAGAGAAGTAAACTTTTAGAGAAATACGGCGCTGTTAAAGGACGACTTTATAATTCGGACGATATTAGAACAATGGATCTTCAAAGAAGA	EDPDYQTNIRYDEYPMVVPKKRTALLVNRLMVALKDALEEDERERSKLLEKYGAVKGRLYNSDDIRTMDLQRR
Allatotropin	MK751538	TCTCCTAAAAAACTGATGAGACCCAGAGCTACCAGAGTTGGCGATAATATGGAGCTATTCACGGCCAGAGGTTATGGGAAACGGTCAAGCGGTGGCTGCAGGAACTGTAAAAAAGAGATGTCCTTGATAAGTGCAAGAAGATATGGAAAACGAGACCCAGAAAAAATGGAAAAGCTATTATGTATGATCACCGATTGTAAGAATAACAAGAACGTGTTAACTCTTGACGACGACTTTTCAAAGATGCTGGAAC	SPKKLMRPRATRVGDNMELFTARGYGKRSSGGCRNCKKEMSLISARRYGKRDPEKMEKLLCMITDCKNNKNVLTLDDDFSKMLE
Bursicon	MK751539	ATGGAAAGATCATGTATGTGCTGTCAAGAATCGGGAGAAAGAGAAGCTTCTGTATCACTTTTCTGTCCCAAAGCCAAACCAGGGGAACGGAAATTTATTAAGGTTACTACAAAAGCACCTTTAGAATGTATGTGCAGACCCTGTACTGGTGTTGAAGAAAGTGCTGTTATACCCCAAGAAATTGCCGGTTATGCTGATGAAGGTCCTTTATCAGGTCATTTTATGAAATCACATTTGCAGTAA	MERSCMCCQESGEREASVSLFCPKAKPGERKFIKVTTKAPLECMCRPCTGVEESAVIPQEIAGYADEGPLSGHFMKSHLQ
Calcitonin	MK751540	ATGAAAGCACTGTTGTGTATTTCATTGCTAACCATAGCAATTTCATTAGGTTCATCAGCTCCAAATCCAAAATATAGAACACCGAGTGGCGAAGCTGCTATATTTTATGATCAAGTTTTGAAAAGACAACAAGAATATAAATCCAATATTAAGAGATGTCTCATGCTTGGTAGCGAAGACTGTATCAACAGCGTGCTTAGAAGAGCCAGAGCTGAGAGTGATTTTGTTCAAAATGGTTTTACTCCGGGGAAGAGATGTGTATTAGGAGATAATAATTGTAATGGAGATGGAATATCAGGCGCTGGATCTGACAGTGACATGGTTAATGGCGGCTTTAATCCAGGAAAGCGTTGTGCCAATTTAGGGGATGAAGGATGCAGCAATAAAGGTATACCACAT…	MKALLCISLLTIAISLGSSAPNPKYRTPSGEAAIFYDQVLKRQQEYKSNIKRCLMLGSEDCINSVLRRARAESDFVQNGFTPGKRCVLGDNNCNGDGISGAGSDSDMVNGGFNPGKRCANLGDEGCSNKGIPHARTDSDWVLSGFNPGKRCANFGDEGCSNGGIPGASADSEWLNGGFNPGKRCANFGDEGCSNGGIPGASSDNEWINGGFSPGKRCANFGDEGCSNGGIPGAAVDNEWLNGGFNPGKRCANFGDEGCSNGGIPGAAADSDWLNGGFNPGKKR
Capability/CAP2b	MK751541	ATGAAGTTTCCAAGTTCCAACGTGGTGGTGTTTCTTGCTTTCTGTTTGATATGGGAAGTAGTCGGAGGCTTCAGCGATGGCACAATTCCCACAAAAGAAATTAGAGATAGAGACCACAGAACCATGAGGGTAAATATGCGCGTGGGTAAACGCTACGGTGACGGCGGATATGAGGAGGACGAAGTTGTAAGCAAACGAGACATACACAACCCTAAACGAAGACTGCGTCTGGTCGTGCGACCTGGTAAAAGAACGTTCGAACTCGACCAACCCTTACAATTTTACACAGATCCGCAAGAGGGAGACAAAACAATCATCACAGATTTCAAACGGTCCTCCCCACAATTCCTGCTGAATCCCAGAGTGGGGAAACTGGACAAGACATGGAACGTACGACCG…	MKFPSSNVVVFLAFCLIWEVVGGFSDGTIPTKEIRDRDHRTMRVNMRVGKRYGDGGYEEDEVVSKRDIHNPKRRLRLVVRPGKRTFELDQPLQFYTDPQEGDKTIITDFKRSSPQFLLNPRVGKLDKTWNVRPVDKRNDPKATDLWFGPRIGRSNDEKLDDVPWNYVILNDNNISKMSAFKPNDVEDQINEEPVD
CCHamide-1	MK751542	CAGCGTCGAGCCGTCGTCTACGTCCGAGCAACAAGTACGTCAAACGCGCACCTGAAGAACTTGCTGGTGAAACGGTCATCGTCCAGTCCGCGAACCATGTGCCGTCAAACAGCTGGAAAGAGCTCTCTCACCGCAATCTTTTTCAAAATTTCGATCGTTTTGGCTGTAGTTTTATGTTTGCATTTGGCAAGCGGGAGAAATGAAATTAAAAAAAGTAGGGGATCCTGTCTAAGCTATGGTCATGCTTGCTGGGGAGGCCATGGGAAAAGAAGTGGAGACGAAGCGCCCTTCGCCCGCACCAACGTCGCCGTGCCCTCCGACGATCCCGACGCCAGAGCGAAATGGTTCCTCTCCAAACTGATCACTCCCCTGGAGCTTAGATATTACGGAAAGAAGGAA…	MCRQTAGKSSLTAIFFKISIVLAVVLCLHLASGRNEIKKSRGSCLSYGHACWGGHGKRSGDEAPFARTNVAVPSDDPDARAKWFLSKLITPLELRYYGKKETDTTNGRSDVQDLLN
CCHamide-2	MK751543	ATGCTTTGTTTTACTCCTTTCCAAATTTTCAAACTGTCAAAGTTTCTCATTTTAGCAAGTTTATTACTTCATGAAATTCACGCAAAGAGTGGGTGTAGTAATTTCGGCCATTCCTGTTTCGGGGCATTGGGGAAGAGGTCAGAATTGACTAATGAAAATTACGAGATGGTACAGAACGGCGAAACGGAGCTTGAAAGTTCACCTTACGGATATGCTGGTCTAAAGATTCCTATAGCTTATCCCAAAAGATTTTACAAATCAAATAGGATGTCAGCTGAACAATACGATGAGCTCAATAAAATTATTCGAGATTGGATAGTGCATAACCGAAAGCAGGAAGAACCAGAAATAAAGTAA	MLCFTPFQIFKLSKFLILASLLLHEIHAKSGCSNFGHSCFGALGKRSELTNENYEMVQNGETELESSPYGYAGLKIPIAYPKRFYKSNRMSAEQYDELNKIIRDWIVHNRKQEEPEIK
CNMamide	MK751544	ATGATACCACCGGTTTTACTAGCTGGGATAGTGTTTTTCGGGAATTTTCCGATAATATTCTCGAGGAATTTGCCCGTAAACGAGAGACATTTTTCCGTTGAAACCTTCTTGAACAGTGACCAAAGGCATCTAAAAAATCACGGCGCTATTGACGACATTATTTCGTACATGACAAATCAAGGCAATGCAGATATACCAATAACTGAATATGAAACAAATGAAGTCACCAACGATGACAGCCGGCAAAACATTACCGACGAGTTCGAACAAACTTACTTGATAGTGAAAACCAAAACGAGAAGAAGCCGAAGGGGAAAACGATATTATCAAATCCATCACACGCTTTGTCACTTCAAGATATGCAACATGGGCAAAAGGAGGCGTGTCTCATAG	MIPPVLLAGIVFFGNFPIIFSRNLPVNERHFSVETFLNSDQRHLKNHGAIDDIISYMTNQGNADIPITEYETNEVTNDDSRQNITDEFEQTYLIVKTKTRRSRRGKRYYQIHHTLCHFKICNMGKRRRVS
Diuretic Hormone 31	MK751545	ATGAAGTCCACAACATCAAGCAGCAACACTGGAAGTTCGCTTTTGATTATGGTCTTATCTGTTCTCGTAGTTTTCGAAATAGCGTCCACATTCGCAGCTGCATACCCGGCAAGTTATTCCGGCTACTATTCACCGATCGGATTTGAAGAACAGAATCCCAATTTCATCAATCTTCAACAAGCAATTGCAAGGCTAAGACAAGCTTTCATTGATAACAACGATCTCGAAAACTCCAAGAGAGGACTTGATCTGGGATTAGGCCGAGGATTCTCCGGATCCCAAGCCGCCAAACATCTGATGGGCTTAGCTGCCGCCAACTTCGCCGGAGGCCCCGGAAGAAGACGCCGCAGCGACGACGAGGCCTAA	MKSTTSSSNTGSSLLIMVLSVLVVFEIASTFAAAYPASYSGYYSPIGFEEQNPNFINLQQAIARLRQAFIDNNDLENSKRGLDLGLGRGFSGSQAAKHLMGLAAANFAGGPGRRRRSDDEA
Diuretic hormone 44	MK751546	ATGTATATTTATTGTGTTAGTTGTGCTATAGTTGAAGCAAGTGAAGCATACCGGTGTGTGGTTTCATTGAGATTTAATATACCGAAGACAATCTTGGCACAAATGATGCGCACTAGCATCTATTTGGTTTGCGCAGCAGTGGTAGTTGCCGTACGTAGCGAAGACAACCATCAACTAATGAACAGATACCTGGAGCCGGTTGATGTGTCCGTCGATCCCGAAACCGTAAACTATCTTCTACCCAAACTGGCGGCCAAATACAGACCGAACAGCGACTGGAAAGACGTCACGGACCCCAGATTATATGTCCTTACCGAGATGGAATCCAACGACGTAGATAACCAGAAAGAGCCCCGATTTACGGACGTCAGTTCCTACATCCGCTCGAAAAAACAATCG…	MYIYCVSCAIVEASEAYRCVVSLRFNIPKTILAQMMRTSIYLVCAAVVVAVRSEDNHQLMNRYLEPVDVSVDPETVNYLLPKLAAKYRPNSDWKDVTDPRLYVLTEMESNDVDNQKEPRFTDVSSYIRSKKQSSRIGEAGGSLSIVNSLDVLRNRLLLEIARKKAKEGANRNRQLLMNLGKRAYMHNLPRIFFPTSK
Ecdysis triggering	MK751547	ATGATACGAGTAGCAGCTTTCATTACCTGCGCAGTCATGATGGTCATCGCTGAGGATCCCGATCCGTTTTTTCTGACGGCTGCCAAGAGCGTGCCGAGGATCGGTCGCAGTCCCAACAGGAACCCCAGCTTGGATTTTGAGAAGTTCTTCTTGAAAGCCTCCAAATCCGTACCCAGAATTGGAAGAGGGAATGATGTTCCATTCCCCAATGATCAGGATATTTGGGACAGTCCAGTGGCGTATCGAACATGGGGAGATATAGCTAATTTATATGAGTATCATCCTGAATTGTTCGCCAATTCTGATTTGGGCGTTCAGGACCTTTTGAGCGATCGTGTCTCTGAGGGAGGACGTTTCAAACGAAGCGCCCCCACCAAATCAAAAACAACTTGA	NCVQCKQMYGHYFEGKTCGDTCVASNGMLVPDCNNPGTIGNYLKRLY
hormone	MK751548	AACTGTGTTCAGTGTAAGCAGATGTATGGACATTATTTTGAGGGGAAAACTTGTGGTGATACCTGCGTTGCAAGTAACGGGATGCTGGTTCCGGATTGCAATAATCCCGGTACTATAGGAAATTACTTAAAACGACTGTACAGGAAATAA	NCVQCKQMYGHYFEGKTCGDTCVASNGMLVPDCNNPGTIGNYLKRLYRK
Eclosion hormone	MK751549	ATGAACTGTACTAACTTAAAAGTAAAATGTTTTATTCTTTTTGTGCTTTTTATGGTTTTGTTATTAAGTGAAGCTGGACCCACCAGAAGAAGAGCCTGTTCACCTCTTCCTCAATGTTGCCGAAGATATGTTCATTCCATTGGCTGCAGAGGCGTCGCCGCTAAAAGAAACTCTTATACTTTCCCTCAACAAGAGAATTCACCTAAAAATAAGTATTTATTTGAAGAAGAAAATCCATCAGCTGCAAACGTCCAACGACTAATTGAGCAGAACCATGAATTTGAAAATGACGACGTGTAC	MNCTNLKVKCFILFVLFMVLLLSEAGPTRRRACSPLPQCCRRYVHSIGCRGVAAKRNSYTFPQQENSPKNKYLFEEENPSAANVQRLIEQNHEFENDDVY
Elevenin	MK751550	TGATTCGCCGTTCGCCTGCTAGTTGCGTACAAGAAGAGCTCTTGCGGTTTTTGCGCGTTCATTCTCCATGGGGACCTCAATCATATTCCTGGCCTTCTTCATCTTCCAATCAGTCCTCTCCTACACAGACGATGCCTACGAGCATTTCGAAGCCTACGCCGCCCCAGAGGATGCCGAAGTCGAGTCATACAACGAGAGGAAACCCCGTAGCGACAAATTCTTAAGATTCGGCAAAAGACTCTGGGACTACGAGACCAACAACGACCTCTACGAAGACAGCAACATCCCCAGGCCTCCTCGAACAGGAAGTTTCAGCAAGAACACCCAACAGCGCGCCGCCAGAGACTCCAGCTACATCCGGTTC	NLKVKCFILFVLFMVLLLSEAGPTRRRACSPLPQCCRRYVHSIGCRGVAAKRN
FMRFamide	MK751551	CGCCTCGTCGAGCGAGAACTCCAAACGTCACGAGAACTTCCTGCGCTTCGGCAGGAACTCCAACTTCATGAGATTCGGACGGGCCGGCGCTCGGTCCGCCAAGGAAGAGATGCTGAAGAGGCTTCTGGACTCTAGCAACGAACCTCTCGTCGCCTACCTGCGGAATCTGATGCTGCAGTCCGAGGACGGTGAACTTAGTGAGATGTAAGCTCGTCTGGTTTAAGCTAAACATGTATATTTAACGAATATAACAGTATTATTATTATTATTACTATCGATGTCTTTTTCCTGTGTCTATCTATACGCTGTGGCTGGATATGTAACATTCGACGTGTAGCTAGACACGTAACCCC	MGTSIIFLAFFIFQSVLSYTDDAYEHFEAYAAPEDAEVESYNERKPRSDKFLRFGKRLWDYETNNDLYEDSNIPRPPRTGSFSKNTQQRAARDSSYIRF ASSSENSKRHENFLRFGRNSNFMRFGRAGARSAKEEMLKRLLDSSNEPLVAYLRNLMLQSEDGELSEM
Glycoprotein hormone alpha 2	MK751552	ATGCTGGCATTCTATTTTTTGTTTTGGGTAGTTTCGTTTTCCAATGGATTAATTGTCACGCAGGAGAAAGCTCTGGACTGGAACAAGCCCGGTTGCTACAAAGTTGGGCATACTCGTAAAGTCAACATTCGGGACTGTGTATCGTTCGACATCACCACCAACGCTTGCAGGGGATTTTGCGAGAGTTGGGCAATACCATCGGATCCCCAAAACAGCCAGATAACGCAACCCGTAACTTCTATCGGCACATGTTGCAACATCATGGAAACGGAACCGATCGAAGTACGGGTACTGTGCAAAGAGGGTATTCGCACCTTCGTCTTCAAGTCCGCGGTCACCTGCGCCTGCTACCACTGCAAGAAAGATTGA	MLAFYFLFWVVSFSNGLIVTQEKALDWNKPGCYKVGHTRKVNIRDCVSFDITTNACRGFCESWAIPSDPQNSQITQPVTSIGTCCNIMETEPIEVRVLCKEGIRTFVFKSAVTCACYHCKKD
Glycoprotein hormone beta 5	MK751553	GGTACAAAATTGAATGGAAACTTTTTCCGGGGGGCCATTTGTTCGTTATCAATAAAACATCAACAAGTTGGCCTGAAGCGCTTGTGCTGACACTTGGACAGCTTCAATTAGTCGGAAATGATGTTCCAATTGTCGTTCTGTCTGCTGGTGATGCTGGCCGCCATGGTCCGGTGCCAAAGCATCATTGAAGCCGGGAGCTTGGGCAATATTGACGAGAATGCTACACTGAAATGTCACAAACGGGTTTACAACTACAGGGTGTCCCAGTTCGATCAGAACGGCAAGGAATGCTGGGACGTACTGAGCGTCAGTGCCTGTTGGGGACGTTGCGACTCCAACGAGATCCCAGATTTTCGTTTCCCTTACAAGAAGTCCAACCACCCAGTATGCGTCCATTAT…	MFQLSFCLLVMLAAMVRCQSIIEAGSLGNIDENATLKCHKRVYNYRVSQFDQNGKECWDVLSVSACWGRCDSNEIPDFRFPYKKSNHPVCVHYGRNKAFVILRNCEEGALPSAARYEYYEAADCKCQLCSSLDTSCEGLRYRSQRSRPDAGGFK
locust insulin-related peptide	MK751554	ATGGGGACAGGAAAGCCCAGAAAGATGGGGTTTTATTACCTACTAATAGCCATTATCTTGATGCATCTGATGCTCTCTTGTCACGGGACGGAATATAGATTCCCGGTGAAAGCGGAAAAGAAGAAATATTGCGGGAAAATATTATCGGATACGTTGGGTACGCTCTGTCAAGGGAATTATCAGGAATATTACAGGATACCAAAACCGTATCCTCTACAAAATCGAGCCAAGTCAACGTCTCTTCTCGGCAGACTCCAAATAACCGGCGGCGTCTATGAAGAATGTTGCGCCCGAGCCTGCACGAAGGAAATCCTCCAATCGTACTGCGGCGGTTCCGGATCCCGATGA	MGTGKPRKMGFYYLLIAIILMHLMLSCHGTEYRFPVKAEKKKYCGKILSDTLGTLCQGNYQEYYRIPKPYPLQNRAKSTSLLGRLQITGGVYEECCARACTKEILQSYCGGSGSR
Ion transport peptide a	MK751555	ATGAGTCAGCGATCGCAGAGTCAGCGCGGAAGCGGCATTAGGGCGGTGTGGACTTGCCTGGCCATCGCGCTAGTGGTGCAAGCCGTATACGCCAACAGCCCCTGGAGGGGTGAGCGTGGTGTCGAAAGGGGTGTCGGGCCGCTACTAACCCACCACCTAACCAAGCGGTCATTCTTCGATATTCAATGTAAAGGTGTTTACGACAAGAGCATCTTCGCCAGACTGGACAGGATCTGTGAAGATTGCTACAGCCTGTTCAGGGAGCCACAGATTCACTCTCTATGCATGTAA	MSQRSQSQRGSGIRAVWTCLAIALVVQAVYANSPWRGERGVERGVGPLLTHHLTKRSFFDIQCKGVYDKSIFARLDRICEDCYSLFREPQIHSLCM
Ion transport peptide b	MK751556	ATGAGTCAGCGATCGCAGAGTCAGCGCGGAAGCGGCATTAGGGCGGTGTGGACTTGCCTGGCCATCGCGCTAGTGGTGCAAGCCGTATACGCCAACAGCCCCTGGAGGGGTGAGCGTGGTGTCGAAAGGGGTGTCGGGCCGCTACTAACCCACCACCTAACCAAGCGGTCATTCTTCGATATTCAATGTAAAGGTGTTTACGACAAGAGCATCTTCGCCAGACTGGACAGGATCTGTGAAGATTGCTACAGCCTGTTCAGGGAGCCACAGATTCACTCTCTATGCATGAAAAATTGTTTCACAACAGACTATTTCAAGGGCTGCCTTGAAACGTTACAGCTCTCTGACGAAATGGAACAGATTCAAAGTTGGATAAAACAAGTGCACGGGGCAGAACCC…	MSQRSQSQRGSGIRAVWTCLAIALVVQAVYANSPWRGERGVERGVGPLLTHHLTKRSFFDIQCKGVYDKSIFARLDRICEDCYSLFREPQIHSLCMKNCFTTDYFKGCLETLQLSDEMEQIQSWIKQVHGAEPVV
ITG-like peptide	MK751557	ATGAAAATCTATCCAGCTGTATTGGCCATCCTACTGGTCACCCAAAAGGCCAACGCTTGGGGTGGATTATTTAACAGATTCTCGCCCGAAATGCTCGCCAATATGGGATATGGCGGCCATGGAGGTGGAATGAGCAGAGATGGAGAGGATAATTTCTTAGAAGAATATGGAAACGAAGTGGATATGGAGCCTTGCTATGGAAGGAAATGCACTGCGAATGAACACTGCTGTCCTGGATCAATATGCATTGATGCAGATGGTGTGATTGGTTCATGCGTGTACTTCTACGGTCGGCGGGTAGGCGAACTTTGCCGAAGGGATTCGGACTGTGAGTCAGGTCTGGTCTGCGCAGAATCCGACTCAGGCCCTAACGCTCGTATCTGTCGACCTCCAGTTCAT…	MKIYPAVLAILLVTQKANAWGGLFNRFSPEMLANMGYGGHGGGMSRDGEDNFLEEYGNEVDMEPCYGRKCTANEHCCPGSICIDADGVIGSCVYFYGRRVGELCRRDSDCESGLVCAESDSGPNARICRPPVHQDKQYSEPCHMSSECDISRGLCCQLQRRHRQAPRKVCSYFKDPLVCIGPVATDQIKDAVEHTAGEKRITGLAAFKRPMMH
Myosuppressin1	MK751558	ATGAAAACTTCCCTTGTTATACTTATATTCGGCGTAGTATGCAGCATCTTCTTCTTATCCACTGGATCGGCATCAGTGATTAGCTGTCCACCCAACAGCTACTACAATCCAGATGTTAATCCAAAGATCAGTCAACTTTGCATGGCCATCGAACAAGTTCTCAGTGAATCATCACCACAAAATGATAGATTTTTGTCCAGATTGGTTGATGAAAGGAATGCCAACTTGAACGCCAAGAGACAGGATGTTGACCACGTTTTCTTGAGATTTGGACGATCTGGATTGTAA	MKTSLVILIFGVVCSIFFLSTGSASVISCPPNSYYNPDVNPKISQLCMAIEQVLSESSPQNDRFLSRLVDERNANLNAKRQDVDHVFLRFGRSGL
Myosuppressin2	MK751559	ATGAGATCGGTTCTGATGATGATTATCTTTGGTGCAGTTGTCGGTCTTCTTGGCTTGTCCAGGGGATCAGCATCAATTATAAACTGCCCACCCAGCGGTGATTTTCGACCCGATACTAATCCTAAACTCATTCAATTATGTTCATTAGTAGAACAGACCCTTTTAGATTCCTCAAAAGACAGATATTTAACAAGAATGACTGATGAGAAAAGCCTAAACGCTAAAAGACAGGATATGGACCACGTTTTCTGGAGATTCGGAAGATCTGGATTGTAA	MRSVLMMIIFGAVVGLLGLSRGSASIINCPPSGDFRPDTNPKLIQLCSLVEQTLLDSSKDRYLTRMTDEKSLNAKRQDMDHVFWRFGRSGL
Natalisin	MK751560	ATGCAATCCTGCAAGGGTCAGTATACGATCTACTTCACAACCTTAAGGATGTATCCAGTGTTTAGTTTCCTCGTATTCGTGTTACTAGCTCTTGTCCACTGCCAAGATCCACGAAAAAGACTTGTCGATTCGTCGGATTACCAAAAAGACGATGACCTTCCCTGTACGATGAAGAACTGTTACAAACGATCGGCGAATCAGGAAGATATGGGTCCATTCTGGGCGAACAGGGGTAAAAAGGATCCATCCTACAGTTCGGATAAATTCATGATCCAGGAACCTCACTGGATTCTGATCAAAAAGGATCCGGAAGTCGAACCGTTCTTCACATCTAGAGGAAAAAGACCGTTGAAGTATGTTTACGATGACAGTGTCAAGCCACCCAGAGACCGCCGCGAT…	MQSCKGQYTIYFTTLRMYPVFSFLVFVLLALVHCQDPRKRLVDSSDYQKDDDLPCTMKNCYKRSANQEDMGPFWANRGKKDPSYSSDKFMIQEPHWILIKKDPEVEPFFTSRGKRPLKYVYDDSVKPPRDRRDYVVDGEMDPAFFAARGKKNMDK
Neuroparsin	MK751561	ATGAACGCAAGCATTGTATTAGTCCTGATGATCAGCTTCATGTTGCCCTTGAGATACGAAGCTAGATCCTACTTATGGATGCCATGCACCCCCTGCAGAACAATGGAAGAGTGCGATTTAGAACCCCCAACCCCCTGCGTGTGGGGAGAGGCCCGGGATGAATGCGGAAAACGTATATGTACAAAGGGACCTGGTGAGAGATGCGGAGGAAAACACAACATCTTGGGCAAGTGCGGTGAGGGAATGATGTGCAAATCGGACGAGAAGTGCCACGGTTGCTCCCTCGTGACCTTGGAATGCTACAACTAA	MNASIVLVLMISFMLPLRYEARSYLWMPCTPCRTMEECDLEPPTPCVWGEARDECGKRICTKGPGERCGGKHNILGKCGEGMMCKSDEKCHGCSLVTLECYN
Neuropeptide F (long transcript)	MK751562	ATGTGGTGGTCAACTTTAAAATGGGTGTTCTTCGGACTTACCTTGACCATGTTGGGAACGAATGTCAGCCGAGCTGCACCATCACGAGACGAGAATATGTTCCGAGAGTTGATGAAGCTAGACCAACTCTATTCTTCCATAGCCAGGCCTAGTTTAAGGAGCATACCAATGTCGGCGGAGGTGGGGCAAAAAGTACAAAGGGCGCTCAACATGCTACGACTTCAGCAACTGGACAACATGTACGCGCACAAGTCAAGACCTAGATTCGGTAAACGCGGAGAAGGACAACTTCGCAATAATGGAGCCAGTGTTGATTATGATAATAATCAGATTCAGTATCGAGGAGAAGCAGATGGATCTTTGCCAGAATGGTTGCCGCTAAGAAGATGA	MWWSTLKWVFFGLTLTMLGTNVSRAAPSRDENMFRELMKLDQLYSSIARPSLRSIPMSAEVGQKVQRALNMLRLQQLDNMYAHKSRPRFGKRGEGQLRNNGASVDYDNNQIQYRGEADGSLPEWLPLRR
Neuropeptide F (short transcript)	Unigene0020442	ATGTGGTGGTCAACTTTAAAATGGGTGTTCTTCGGACTTACCTTGACCATGTTGGGAACGAATGTCAGCCGAGCTGCACCATCACGAGACGAGAACATGTTCCGAGAGTTGATGAAGCTAGACCAACTCTATTCTTCCATAGCCAGGCCTAGATTCGGTAAACGCGGAGAAGGACAACTTCGCAATAATGGAGCCAGTGTTGATTATGATAATAATCAGATTCAGTATCGAGGAGAAGCAGATGGATCTTTGCCAGAATGGTTGCCGCTAAGAAGATGA	MWWSTLKWVFFGLTLTMLGTNVSRAAPSRDENMFRELMKLDQLYSSIARPRFGKRGEGQLRNNGASVDYDNNQIQYRGEADGSLPEWLPLRR
Neuropeptide-like precursor1a	MK751563	ATGGGCAACCTGGGGTTGGTTCATGTTGCTTTGTGGTGTGCTTTAGTGGCTTGCGCCCTAGTCGATAAGAAGGTTTACTGTGCTTCCTGTGATGTAGAAGTATCTGAAATATTACGCACCTTACTGAACCCTCAGGAAAATGACTCATTACAAGTTCAAGCTTTAAGACGACAGCTACTCCATAAATTACAAGACATGGATGTTGCTGATCAAGAGTATGAGAAAATATATAAAGGATATACCTCTCCAACAAAATGGACCGAATTTTCGGATGAACAGAAACGTAACCTGGAATCATTGGCTAGAGGTGGTACTTGGTATAAAAACCCACCATTAGCTGATGACTACAAGAGAAGTCACTATAATTTACTTGGAAGTCCTGACTTACCACTAACAACT…	MGNLGLVHVALWCALVACALVDKKVYCASCDVEVSEILRTLLNPQENDSLQVQALRRQLLHKLQDMDVADQEYEKIYKGYTSPTKWTEFSDEQKRNLESLARGGTWYKNPPLADDYKRSHYNLLGSPDLPLTTELLANQKRSIEALARNGELNHHQNNQDFRTMLGEFNDKRNVASLAKHFNYPRQTIGKRSISSVAKNGDLPNVYGKRNIQSLARDGLLGKKFTEFVEAPQDKRIHSIKTEQRRKRQADYFSNEAVYQMPVDYEDVLQDLEAAEQNIYPLEDKRFLGRLPQMGKPRTTAIPKSHRYH
Neuropeptide-like precursor1b	MK751564	ATGGGCAACCTGGGGTTGGTTCATGTTGCTTTGTGGTGTGCTTTAGTGGCTTGCGCCCTAGTCGATAAGAAGGTTTACTGTGCTTCCTGTGATGTAGAAGTATCTGAAATATTACGCACCTTACTGAACCCTCAGGAAAATGACTCATTACAAGTTCAAGCTTTAAGACGACAGCTACTCCATAAATTACAAGACATGGATGTTGCTGATCAAGAGTATGAGAAAATATATAAAGGATATACCTCTCCAACAAAATGGACCGAATTTTCGGATGAACAGAAACGTAACCTGGAATCATTGGCTAGAGGTGGTACTTGGTATAAAAACCCACCATTAGCTGATGACTACAAGAGAAGTCACTATAATTTACTTGGAAGTCCTGACTTACCACTAACAACT…	MGNLGLVHVALWCALVACALVDKKVYCASCDVEVSEILRTLLNPQENDSLQVQALRRQLLHKLQDMDVADQEYEKIYKGYTSPTKWTEFSDEQKRNLESLARGGTWYKNPPLADDYKRSHYNLLGSPDLPLTTELLANQKRSIEALARNGELNHHQNNQDFRTMLGEFNDKRNVASLAKHFNYPRQTIGKRSISSVAKNGDLPNVYGKRNIQSLARDGLLGKKFTEFVEAPQDKRIHSIKTEQRRKRQADYFSNEAVYQMPVDYEDVLQDLEAAEQNIIRLS
NVP-like	MK751565	ATGGGGTTATGGTCCATTCTGGGCGCCTACTTGATGGCCGTGTCCCTGGCACTGCCCTCGTCCCTGGTCGACGAGATAAAGTCGAGCGAGATGAGAAACAATAAAGTTAAACGAGCTCATCCCGATCATGCCGGTTCCAATGAAAACGTCGACCCAGTCAACTATTTCAACAAGCATACTTCCGCTATCAAGAGAGGCACAAATCTGAAGACGACCGATCCCGAATTATCCAGTTTGCCTGAATGGGACGCGGACCAATTCTACTCCAACTCCGATTTCAATATGGACAGCCTGCAATCGGGCTTGTTCAATTCGCCCAATATGCCGCTGGACGACAAGACCATCGCCGAATACGAGAAAGGGTATCGGTACGGAACAAACAAGGATAAATTGGATGAA…	MGLWSILGAYLMAVSLALPSSLVDEIKSSEMRNNKVKRAHPDHAGSNENVDPVNYFNKHTSAIKRGTNLKTTDPELSSLPEWDADQFYSNSDFNMDSLQSGLFNSPNMPLDDKTIAEYEKGYRYGTNKDKLDEALENAVLKNEAYREPYSQFRFYGSNDRRRRRDTNKQMRPKRNVDLTPEEVLALLTLYENNRSGLKENDNYRQPIFKYGKGYGVGDIEDFDTDNNDETWLNAPVFPHASVENDVSDNYLYDYVNGAEPDYKARWGGFGDAKKKRFIIAKKRTSDPTRMIRYINGPNQNDFDTLSNLMNNQKEPRLDVPIYHRKVL
Orcokinin B	MK751566	ATGTGGTACACCGGCATAGTGTTGACAATCTTGGTCGTTTTGGTCTTAGTTCAAGCCGGTACTAAAGAAACCTATCAGTATAAATTCAAGAACCTAGACAATTTCAACCTCAAAAGCCCAAATAACGGGGAGAATACGTTTCATTTCACTGATGAGCGAAGCATAGATAACATTGGAGGAGGAGGAATATTGTCCAGTCGATCGATTGATCCTATTGATGGAGGTGGCATTCTCGAGGCTAGATCTATTGATGCTATAGGGGGTGGTTTACTAGCTTCCAGAGGTCTCGATAGTATTGGAGGCGGTGGTATACTTTCATCAAGGAGCATTGATAACATTGGAGGAGGGGGAATCTTGGCTTCTCGTTCACTTGATGGTATAGGTGGAGGCTTTCTATCT…	MWYTGIVLTILVVLVLVQAGTKETYQYKFKNLDNFNLKSPNNGENTFHFTDERSIDNIGGGGILSSRSIDPIDGGGILEARSIDAIGGGLLASRGLDSIGGGGILSSRSIDNIGGGGILASRSLDGIGGGFLSSRGIDSIGGGLLSSRAINGIRGGLLASRAIDNIGGGGLLTARGIDGIGGGGLLTARAMDGIGGGGLLASRAIDGIGGGGLLTARAIDGIGGGGLLASRAIDGIGGGGLLASRAIDGIGGGGLLASRAVDGIGGGGLLASRAIDGIGGGGLLASRAIDGIGGGGLLASRAIDGIGGGGLLISRAIDGIGGGGLLASRSIDGIGGGGLLSARAIDGIGGGGLIKKK
Pigment dispersing factor	Unigene0014866	ATGAAAAAGATAAAAAAGCTTTACGACCTGCAAAATGTTATGCTGCTGGCGGTACTGTTGCTTCTTATAGCAGTCGATAAAACAGAAGCTTATCCGGCTAATGAAGATAGATTCATTGATCGAGTATATGCTAGTCCTGGAGCTCATCAACTAGCCAGCTGGCTCGCCTTCCAACTGAGACCAAAAGAATTTATACCACCACTCGAAGTTCCCATCATTCCCTACCGCTTACCTTTGCAAAACGGTAAGCGTAACTCAGAAGTTGCCAACGCCATGATCGGATCGGAAGAAACCCAGAAAATGTACCGAGAAGGATAA	MKKIKKLYDLQNVMLLAVLLLLIAVDKTEAYPANEDRFIDRVYASPGAHQLASWLAFQLRPKEFIPPLEVPIIPYRLPLQNGKRNSEVANAMIGSEETQKMYREG
Proctolin	MK751567	ATGGTTTCAAAATCCGTGTTACTGATCTGTATCATGGTCGCCGTCTTTGCCCTGATCAGCCAGCATCAGACGGAGGCCAGATATCTGCCTACGAGGTCTAATGGTGACAGGATAGATAAATTGAGGGAATTATTGAAAGATCTTCTCGAATCCGAACTGGAAAAAGAAGATCCAGAGGTAGCGAGGTGGAGGCCAGAGAGCAAGGTGTACTTCAAGCGCGAAGCCGTTCCCGCGCCAGAACCCGTCGAGATCAAACATCAAGTTCGTGAATGA	MVSKSVLLICIMVAVFALISQHQTEARYLPTRSNGDRIDKLRELLKDLLESELEKEDPEVARWRPESKVYFKREAVPAPEPVEIKHQVRE
Prothoracicotropic hormone	MK751568	TATTTTATCAGATATGTCCAAACGGGATTATGTAAGAAAAACTCCTGCGGTATGTTTGAACGATGCCAACCGAAGAAGTACCAGCTGAAAGTAATAAAACGAAGAAATCCACAGACTGACGAAGTCGACAGTATGCTGCTGCAAGAAGCTGCGTTTCCGGAAAGCCTCCAGGAGGAATGGGTGCCCGAATACGTGTCGGTGGTCGTAGGATGTACTTGCATACCGAAAAAGGGTTACAATAATGAA	YFIRYVQTGLCKKNSCGMFERCQPKKYQLKVIKRRNPQTDEVDSMLLQEAAFPESLQEEWVPEYVSVVVGCTCIPKKGYNNE
Pyrokinin 1	MK751569	ATGAGTAAAGTTACAGTTGCCAACACTTTCGTGATCTTCATTGTTTTTTTGTATATTGTAATTCAAGAGACGGAATCATCAGACCCATCCATAAATCTCCGCAAGGAAAAACAGTTGTCCCCCATGTGGTTCGGACCTAGAATCGGCAGGAGAAAACGAAACCAGGAAATCAAGCACAACAACAACAGAAATGACAAGGACGACGACAACCTCCTCGATATATTGAAGGAATCGCCACTGGTTGTCGTAGCAGTGAGAGACGCTGGTAAAGATTTCACGCCTCGTTTAGGCCGAGAGTCCGGAGAGAACAACCCAAATTGGTTCGAGGATGGCGAGTTGATGGAGAGCGCGCCGATATCCAATAGGGCGTCGAATCATTTCAATCCGCGTCTGGGAAGG…	MSKVTVANTFVIFIVFLYIVIQETESSDPSINLRKEKQLSPMWFGPRIGRRKRNQEIKHNNNRNDKDDDNLLDILKESPLVVVAVRDAGKDFTPRLGRESGENNPNWFEDGELMESAPISNRASNHFNPRLGRESFAQFNPRLGREL
Pyrokinin 2	MK751570	TTCCTCCTCATCTCCCTTCTTTTGTTTATCGTGCTGGAAAGGACAGAATCGTCGGATATCGATACGAACAAGGAGAAACCAGTGTCCCCCATGTGGTTCGGGCCAAGGATAGGCAGGAGGAAGCGCAATGAAGATAATTACAGGAACGAAAAGGACCCAGACAATTTTTTGGATATCGATACACCATTCTACATAACGGCCAGAGAAGCTAGCAGTAGTTTCATCCCACGCATGGGTAGGGAATCTGGAGAAAGCCTGAACGGTTGGCTGGACAATCGGGATTTCGTCCTTACCAAGCCCGTATCGAACAGAGCGTCAAGCCAGTCAATCAGAGGTCTGGGAAGAGGTTTCACAAGGTATTTTCCACGACTGGGTCGCGAACTT	FLLISLLLFIVLERTESSDIDTNKEKPVSPMWFGPRIGRRKRNEDNYRNEKDPDNFLDIDTPFYITAREASSSFIPRMGRESGESLNGWLDNRDFVLTKPVSNRASSQSIRGLGRGFTRYFPRLGREL
RYamide	MK751571	ATGCATACGAAAAAGTTCGTTGTCCTGCTAATTTATTTAGCATCTATCCTGTTGCATGTTATGTTCACGCAATCGAAAGATACCCATTCTTTCAGACAGATGATTCGCTATGGTAGAGCAGGGAAGAATGACAATTCTGGGTCCATCAACGTACGACCCCGTGGTGAAGTCTTCTACTTAGGTCCGAGGTACGGAAAGCGATCGAAACTGGACTCAACGGTACAGGAAGATAATAAAGACGTACTCTACATGTGCTCCAATGATAAAAACTTTTCGTGCTCATACTCTGGAATCACTAACTTATATAGGTGCAACAGTTTAAGGGGCTCCATCTTGAAAGATAATTCAATATAA	MHTKKFVVLLIYLASILLHVMFTQSKDTHSFRQMIRYGRAGKNDNSGSINVRPRGEVFYLGPRYGKRSKLDSTVQEDNKDVLYMCSNDKNFSCSYSGITNLYRCNSLRGSILKDNSI
Short neuropeptide F	MK751572	ATGCAGTTCTCCTCCGTAATGAGATTCTTCGCTGTTGTTCTATCTTTCATGATCCTCTTGGCCAGCGTATCACCTGCGCCATATTTCTCTGATAATGAAAGTAGTATCAGGGAGTTGGTCGAGATGCTGATGCAGAGAGAAAGGGAGAACAGCTTGGAAGATAGCCGCGTTGGATATCACCAGGTCTCGAGAAAGGCCGGACGCTCACCACAATTGCGTCTGAGGTTCGGAAAGAGAATGGATAATGCATACCCTGTTTCGGCTTACCTGTCTGGACTTAACGATGCAACAACCGAAAACTAA	MQFSSVMRFFAVVLSFMILLASVSPAPYFSDNESSIRELVEMLMQRERENSLEDSRVGYHQVSRKAGRSPQLRLRFGKRMDNAYPVSAYLSGLNDATTEN
Sulfakinin	MK751573	ATGAGAATCTTTGTCACTGATATTTTGGCGATAGTTGTAATTGCAGCCTTGTTGATCTATCATATTGAAAGCTTATCAATATCCGGTTCGAACGGTTTATATGAACGCAACTTGAACCGAAATTCTGGACTGTCGAGATATCATGTTAAATCCGGCTCCAGATACTCAAAGATTAAACCTGAAAACTTCAATGAGCTTACTGATGACGATGATGTTTTCGAACATTCCAAACGACAGCAACAACCGCCCTCTGATGATTACGGCCATCTTAGATTCGGCAAACGCGATGAACAGTTTGATGACTACGGTCACATGAGATTTGGAAGAAATGGCGAATAA	MRIFVTDILAIVVIAALLIYHIESLSISGSNGLYERNLNRNSGLSRYHVKSGSRYSKIKPENFNELTDDDDVFEHSKRQQQPPSDDYGHLRFGKRDEQFDDYGHMRFGRNGE
Tachykinin-related peptide	MK751574	ATGGAAATGTTCTTTAGTCGTTTTTGTGCCACTTGGATTTCTTTGGTTATACTGGCCACTTCTTTCGCGAATGCTGAGGATGACCATCATAAAAGAGTGCCGTCTGGTTTTACGGGGGTAAGGGGCAAGAAATCGATACCAGACGAGGCGTATAATTCGGATGATGTTGAACATAACTTATTAGCGCAGAATTACGATTCATTTGGACCAATGAGCGAAGCGTCCGGTACCCTAAACTACCTCGACAAAAGAGCACCATCGGGATTTTTCGGCATGAGAGGCAAAAAACCATGGAACTATCCAGAAGAATATAAGAGAGCTCCAATGGGATTCGTGGGAATGAGAGGAAAAAAGGGTAGTTTCGACGACGCGTACAATGCCCCAGATGATTATCCCAAA…	MEMFFSRFCATWISLVILATSFANAEDDHHKRVPSGFTGVRGKKSIPDEAYNSDDVEHNLLAQNYDSFGPMSEASGTLNYLDKRAPSGFFGMRGKKPWNYPEEYKRAPMGFVGMRGKKGSFDDAYNAPDDYPKRAQMGFFGMRGKKYYNQPTFSGDVLARMSQVRDKKDTENSSGYFEDKRAPSGFFGMRGKKHPLGFFGTRGKKYPYEFRGKFVGVRGKKSYNDITVPEDYLTDLNLGRFGDDLDWNQLMLLLTEQNEAESSQ
Trissin	MK751575	ATGTTGGATATCTTAAACGAAAGTGTGGTGTGGGGAGCTGTAGAAACTTGTAATTCGTGCGGCTCGGAGTGTCAGTCAGCGTGTGGCACTAGGCACTTTCGAACATGTTGCTTCAACTATCTGAAGAAGAGAAGTAATCCAGAGCCACTTCCTCTAACTCTAGATCCAAGTTTAAGATTGGAATTGTGGTTAGCTAAATCGAAATATCCGTATTTCCAATCAAGGACCGTTTCGCAAGAAGCTCTTGAATTACCAGAAATATCTAGCA	MLDILNESVVWGAVETCNSCGSECQSACGTRHFRTCCFNYLKKRSNPEPLPLTLDPSLRLELWLAKSKYPYFQSRTVSQEALELPEISS
Vasopressin	MK751576	ATGGCTATTTTCAAAAATTCTAAAATCATTATCAATTTCCTTGTATTGGTTGTTTTCGTTAACGTAATTGTGACCGGTTGTCTTATTACCAACTGTCCACGGGGTGGTAAAAGATCCGGTAAATTCCCACTTATCGAAAGAAGTAATGTTAAACAGTGCATCTCATGCGGTCCAGGAAATTCCGGAAAATGTTTCGGACCTTCAATATGCTGCGGACCATTTGGTTGCTTAATGGGCACTCCTCAAACTGTAGGAAAAACACTGGCCGATGTGCATTGGACGGAATTTGCTGTAGCCAAGGTACCAACATTACAACCATACCAAAACAACCATAACAAATTAATATCAATAAATATTTTATTACAGAATCCTGCCATATGGACAAACAATGCTCCATGG…	MAIFKNSKIIINFLVLVVFVNVIVTGCLITNCPRGGKRSGKFPLIERSNVKQCISCGPGNSGKCFGPSICCGPFGCLMGTPQTVGKTLADVHWTEFAVAKVPTLQPYQNNHNKLISINILLQNPAIWTNNAPWTRRMPTSYL

## Sheet: Supplementary Table 2
Table S2: List of neuropeptide receptor genes of red palm weevil
Neuropeptide Receptor	Accession No.	mRNA	Protein
Adipokinetic hormone	MK751489	ATGAAGGAAATCAAGGACTCTCCGTTGGCTGGTAAGACGGTCCATGACCACCGTAACCTGCACGACTGGTCAGATACGTCGAAGACTGCCGACCGCGATCATGACCTACCCATCAACATGATATTCAACGACGGTCATCGACTTTCCATCACCGTCTACAGCGTCCTAATGGTGTTCTCGGCCATCGCCAACATCACCGTGTTGGTACTGTTGATGAGGCGGCGAAAGATGAACCCTTCCAGGATCAACTCGATGCTGATCCACCTGGCTATAGCGGATCTACTAGTAACCTTCCTGATGATGCCCTTAGAGATCGCTTGGGCTTGCACCGTCCAATGGCTGGCCGGCGACTTCATGTGCAGGATCATGAGTTTTTTCCGCACCTTCGGCCTATATCTG…	MKEIKDSPLAGKTVHDHRNLHDWSDTSKTADRDHDLPINMIFNDGHRLSITVYSVLMVFSAIANITVLVLLMRRRKMNPSRINSMLIHLAIADLLVTFLMMPLEIAWACTVQWLAGDFMCRIMSFFRTFGLYLSSFVMCCISIDRYYAVLKPLYLVDLDRRERLMVVGAWIGAMICSAPQMFLFHVEHHPNITWYKQCVTYHSFPSYAHELAYSVSGMILMYAFPLAVIIFCYASILLEIFRRTRDPNRADSVTRSSLAFLGKAKVRTLKMTIIIVFVFFVCWTPYHVMCVWYWYDRDSAQQVDQRVQRGLFLFACTNSCMNPLVYGLFNIRARRKTAKVRPRLSSVGATPRASCLPPQITAETRLSPLEISLKSLE
Allatostatin C	MK751490	ATGGATGACTTCAATCAAACCGACAACTTCACCGACTTCAACCCCTTCAATGAACATTACCGGACCATGTTCCCCTGGGTGATGCAGGTCATACAGACCATATTGTTCACCGTGGTCTGCCTAGTGGGTTTGGTCGGGAATACCCTGGTTATCTACGTGGTGATCCGATTCTCCAAGATGCAGACGGTCACCAACATGTACATCGTGAACCTCGCCATAGCCGACGAGTTCTTCCTCATCGGGATTCCGTTTCTGATCGCCACCTTACTCAACGGCCAGTGGATCTTCGGGCATCACGCCTGCAAGGCCTACATGATCTCCACCAGCATCAATCAGTTCACCAGCTCGATACTGCTTTGTATCATGAGCGCGGATCGATACATCGCCGTCTGTCATCCC…	MDDFNQTDNFTDFNPFNEHYRTMFPWVMQVIQTILFTVVCLVGLVGNTLVIYVVIRFSKMQTVTNMYIVNLAIADEFFLIGIPFLIATLLNGQWIFGHHACKAYMISTSINQFTSSILLCIMSADRYIAVCHPISSPKWRTPMISKVVAFFAWFCSILLMVPIIEHAKEIHLDNKSSCVILWGGFDPENLTLSGNSTDEMDYSSATVFLTYSFIFSFAIPLTLILFFYCQVIKKLKTVGPKNKSKEKKKSHRKVTNLVLTVVTVYVICWLPYWITQLTLSNATANDTFNITLHMLASCLSYSNSAVNPILYAFLSDNFKKSFLKACTCAANKDVNATLHLENSVFPKKSKQSSERFRPTRNTSICPNGEDECDAGPLVKGDPSTSATALTMTSRTNINL…
Capability	MK751491	GTCGTCGCCTTTTCGACAGAGAGATATATTGCTATTTGTCACCCTTTGTATCTGAGAGCAATATCTGGCCTGCACAGAGCAATATGGATAATCGGAGCGCTGTGGATAGTATCTTTAATATGTGCATTACCTTTCGCAGTTAACACGGAAATTACCTACGTTTTCTATCCTTATAATACGACGAATATAGTACAGGAATCTGCCATGTGCGCGATGGTGTCGCAGCCTGAGCATGTTCCTCTCACCGAGTTGAGTACCATCATATTCTTCATATTGCCGATGATAGTGATTGCTGTTCTGTATACGAACATGGGTATAGCTATTGCGAGGGCGTCAGATGGTAAACTTGGAGGAGGTAAACTAAAAGGATCCATCCATCGAAAGAATAAAAAGAATCAA…	VVAFSTERYIAICHPLYLRAISGLHRAIWIIGALWIVSLICALPFAVNTEITYVFYPYNTTNIVQESAMCAMVSQPEHVPLTELSTIIFFILPMIVIAVLYTNMGIAIARASDGKLGGGKLKGSIHRKNKKNQSNKSIIRMLSLVVLGFFVCWAPFHAQRLMTIYFRDNELIEEVNYWMFFITGLFYYFSSTLNPILYNVMSEKMRAAFKEVFCGIKPRTVSKRATFRETSNTYISIQNHSNNHHCNMPDDDLFLGKDTSAILVNE
CCHamide	MK751492	GGCACTCTGGTAGTGATTTTCCTAAGACACAGGACCATGAGGAATGTACCAAACACGTACATCTTCTCCTTAGCCATTGCAGATCTCCTGGTGATCATAACTAGCGTGCCGTTCACGTCCATAGTTTACACGGTCGAGTCTTGGCCCTGGGGAGCCCTTATCTGCAAGCTATCCGAAACAGCGAAAGATATCTCGACGGGAGTTTCCGTATTCACTCTAACCGCACTCTCAGCTGACAGATTTTTTGCTATCGTCGACCCCCTCAAGAAACTTCACACGAGCAGTGGTGGTAGAAAAGCAACTCGTGTCACTATCTGCACAGCTATCAGCATATGGTTATTAGCAATACTCTGCGCCATGCCGGCCCTCATCGGTTCCCACATCAGGAAATTTAGCGAC…	GTLVVIFLRHRTMRNVPNTYIFSLAIADLLVIITSVPFTSIVYTVESWPWGALICKLSETAKDISTGVSVFTLTALSADRFFAIVDPLKKLHTSSGGRKATRVTICTAISIWLLAILCAMPALIGSHIRKFSDDDSNLHFEVCYPFPEGWLNGKYPQVMVMSRFLVLYVIPLTIIFAFYLSMALSLITSMRNVPGEMQGMHRQIKARKKVAITVLVFVAVFAVCFAPIHAFMLFFYFNERSQELYNPFWHYLRIVGFCLCYINSCANPVALYFVSGAFRKHFNRYLLCKRQKRPRCNTCTGQHATSMSMMSTKRQSINRKSTISMNRRNIAANAQETSVT
Crustacean CardioActive Peptide	MK751493	ATGTATGTGAAGAATTGTTCTAAGGGATTGGATTTTGAATTTTTGGACTATAAAGACTGTAATGATACTTGTTTGTGTGTTAAAAATGCAGCTTGGGTTACGAAGAATACTAACGGGTCCAGCATTGATTCATTTTATTTGTATGAGGTGGAACACTTTACAGTCCTCTGGGTCCTTTTCATTGTGATAGTAATAGGAAATAGTGGAGTGTTATACTCCCATTTCATAGGCAGACCGAGGAAAAGCCGCATGAAGTTTTTCATAGCACAATTGGCATTTGCAGATCTCTCCGTTGGTCTGATCAGCGTTTTAACTGATATTATATGGAGAATGACAATAGCCTGGTATGCCGGTGACATTTCCTGTAAATTTATTAAGTTTGCTCAAGCTTTAGTTACG…	MYVKNCSKGLDFEFLDYKDCNDTCLCVKNAAWVTKNTNGSSIDSFYLYEVEHFTVLWVLFIVIVIGNSGVLYSHFIGRPRKSRMKFFIAQLAFADLSVGLISVLTDIIWRMTIAWYAGDISCKFIKFAQALVTYASTYVLVSLSIDRYDAIR
Ecdysis-triggering hormone	MK751494	ATGATCTCACCAATTACGGCGCTTACTACGCCACTGACGCTCAATACCAGCGCCATCTCGACGGACCTCAACTTAACAACCGCCAGCTACAGCTACCTCTACACAGCCACCACATCGGACCTTAGCGGAGTGAATACGACGTTTTACGCAGGAAATGGCAGCTACAATGGGAGTTTGGAATATAGCGGGTTGCTGTTTCCCAGTTATATACGAACTACATCAATGGTGTTTTGCATCATCATAATGTGTCTCGGTGTGATCGGCAACGTTATGGTGCCTATAGTGATCTTTAAAACTAAAGATATGAGAAACAGTACGAACATCTTCTTAGTAAATCTCAGTATCGCCGATCTGATGGTGTTATTGGTATGTACTCCGACTGTTTTGGTGGAAGTGAAC…	MISPITALTTPLTLNTSAISTDLNLTTASYSYLYTATTSDLSGVNTTFYAGNGSYNGSLEYSGLLFPSYIRTTSMVFCIIIMCLGVIGNVMVPIVIFKTKDMRNSTNIFLVNLSIADLMVLLVCTPTVLVEVNSKPETWVLGKEMCKAVPFVELTVAHASVLTILAISFERYYAICKPLKASYICTKARASLICLLAWFVAAVFTSPMLGIAEFKQVDYYDGTKVPACHTLANTFWSALYFLGSIFLFFIVPLIVLLVLYCVIAKNLIYNAASEMLNKHLDNYSIRARRQVILMLGTVVLSFFLCLIPFRVFTMWIILVPEENVYNLGAERYYNILYFCRIMVYLNSAINPILYNLMSSKFRHGFLICSNTRRKLLRKRANGTFSSTQHSSSTRSSTFR…
FMRFamide receptor	MK751495	ATGATAACTGAAGAAATCGACGTAACAAATGAGGTAGACACGTTCAACATCACAGCCGCAAATAACACCTTCAATCCGGATGCGTTTTCCTGCCTGGACTCGCAGTCGGACCAGATTATTTTCTTTCGTTTCGTCACAAACGGTATCCTGCTGAACTTTATCGGATGTTTCGGAATATTGGGGAACTTGATCTCCATGATCATCCTGTCCCGGCCTCAGATGCGGTCCAGCATCAACTATTTGCTGATCGGACTGGCTCGAATCGACACGGTGTTGATCATCACCAGCATTTTATTGTTTGGCTTGCCAGGAATTTATCCCTACAGTGGATCATTATTTAACTATTATTTCAAGGTATATCCACATATCGCTCCAGTGGTTTATCCCCTAGCCACCGTG…	MITEEIDVTNEVDTFNITAANNTFNPDAFSCLDSQSDQIIFFRFVTNGILLNFIGCFGILGNLISMIILSRPQMRSSINYLLIGLARIDTVLIITSILLFGLPGIYPYSGSLFNYYFKVYPHIAPVVYPLATVMQTASVYLTMTVSLERYVAVCHPLRARSLCTYGRARIYVIGIVVFSTLYNIPRLWEGKIKAEWSEEYNMTVYCPMQSDFRDNEYYQTVYIHWLYLICMYLVPFLSLAILNGAIYRQVLKANRERQRLSRLQQREIGLATMLMCVVAVFFVCNLLPMVINIVETFKIPTEDVFDLNMMINLSNLLVTINSSVNFVIYVIFGEKFQRLFLILFCHNSLFFPGRESPDAVTHEDSFVSNGDRSFRLHRQSTTTSRTSGSRNSRMNGSVN…
Long Neuropeptide F	MK751496	ATGGTTAAAGGTAATGCCACGTCGCCCTCACAGGAGAGCGACATACCTCCTCATATCTGGGCGGTTATTCACCAGTTGCTCTTGGGGGTTGGTGGTGCTGATAAGAAAATAGATTTACGCGAACCCCATCCCAAAAAATCTCTCGAGGATGTCGCTTCGTTCATCATTTGTGCGTATGGGGTTTTGACTGTGTATGGCGTCGTGTCCAACATATTTCTGTTCGTTCATATTATACAGTACCGATTGTATAAGGACCCTACTTATAGTTTCATAATGAACAATGCGATAAGTGATATATTTAAAGGTGTAATTGTATTGCCCATCACTCTCTATGTACTGTTAGTTCAGAACTGGATGTTGGGGGAGTTGCTCTGCACTTTCTTACCGATGTTGCAAGAT…	MVKGNATSPSQESDIPPHIWAVIHQLLLGVGGADKKIDLREPHPKKSLEDVASFIICAYGVLTVYGVVSNIFLFVHIIQYRLYKDPTYSFIMNNAISDIFKGVIVLPITLYVLLVQNWMLGELLCTFLPMLQDIPLHVTMLTYVCLAWDRCRYLRNPNKPRLPAFVCTIGTWLTSVCLVLPYPIYIMHIDLGTYFKSPELEGVSICIVNLADDMKEYMRGIFLVTYAGPLAAISYFFVCASRELAYHNAPAVIFFESRGRDSRSRMDSHSTVTADIRSTRGDFDRTSQYSPESFREQDNCRTRYEVHESELDVMKEKRTQKYLGSIVTMYAICLLPLMIMRLARLALVETYENSSHFDYTYVLFVWLAFLPTCLTPAMFVCWQMSRSSKERLKGYFRFS…
Neuropeptide F 1	MK751497	ATGTTCTCCTACGTTTTCGTCTATTTGATAAAAACGAACGTCAACAAAATGGATGACGAGTTTGACAACAGTACCCTAAAAGCAATGTTGAACAAAAGCAGTGAAGTGGACCCGAAATTGTACGAACAATACTTGACAAATAAGGCCATTGATGAGCCCGCCTATACAGTTCTGGCCGTTATGTATGGCATTCTTATAGTGTTAGGAGCTTTGGGAAATACACTAGTGATAATCTCCGTTATTCGAAAATCGTCAATGAGAACGCCGAGGAACATGTTCATCTTTAATTTGGCAGTGGCAGACTTACTTCTGTGTACCGTTACAATGCCGCTTACTCTAATGGAAATCCTAACAAAATACTTTCCATTAGGAAATTACTTGTTTGTCTGTAAGCTCATT…	MFSYVFVYLIKTNVNKMDDEFDNSTLKAMLNKSSEVDPKLYEQYLTNKAIDEPAYTVLAVMYGILIVLGALGNTLVIISVIRKSSMRTPRNMFIFNLAVADLLLCTVTMPLTLMEILTKYFPLGNYLFVCKLIGILQATSTYVSTLSITAIALDRYQVIVYPTKENLQIFGAASILSAIWLIAMILASPLFFIRHLTHHELTMTGSVIFRLDFCIENWPVEHGRAYYSIFSLIFQYTLPIFIVSCSYLSISHKLKRRFQGVLVSTEENLQRNRRQLRGRRLQRTNILLGSIAIIFCISWLPLNLFNLIADLSTDSNKFTSQPMMVCYAICHMMGMSSACSNPILYGCLNENFWKEFKDILCIEKRTDDVVGTSQKVSVRRKSQKHRSKPDLVTAATDYQ…
Neuropeptide F 2	MK751498	ATGCCGAAATTAAAAACCCGGACCCAATCCTACTACTTAATCGAGCTGGTGCTTATTTGTTCCATAGCCATCCCGGCTCAAGCATGCTCCTCGGGTGTTCAGAATTCGAGTAGTTTAGAGAGTGAAATTAAACAATACGTAGATAGTGTGTTACAAACCAAAACGTTTCCGATTATACCGGGTGTTCAGATAGAGAGCGTGAACAATGTGACTGTGTCTGATAAGAACGAGACTTGCGAAAATGGACGCTCGTCCGAATCGATGGAGGGTTATCTTAGTGAGAGGCTGTCGAAATTCGTGGATACGCATGTTATATCTGTTAATTTAGACCAGACGGCGAGGTTTTTGTCCTCGAATCCACCAGATGGCACTGCCGCTGCTGCCGCTACAACAGTAGCC…	MPKLKTRTQSYYLIELVLICSIAIPAQACSSGVQNSSSLESEIKQYVDSVLQTKTFPIIPGVQIESVNNVTVSDKNETCENGRSSESMEGYLSERLSKFVDTHVISVNLDQTARFLSSNPPDGTAAAAATTVADTSGKSSFLAGFGMGMLAFLLKKMLLPVFIGAQFIKSILIAMFLPTILGGVGKLVGKGLSTFSGLSSASTGLNRPQPEIEDFEFKDVDPYNNEAALDAGFDDGDNMGLNTIDSSSTSSPNSRHDFAHNRIYTSPTLNDNYYLQRPKKKTNFKIFHKIPSSSMLLTSYDPFYSPLLSRLDAVFQQMGLGNEKSPQTERCRERLICMMYANPAKYAPYSNLVSAQLSRELNELRKPSSDNPDILRFFRYMKAAKDGQDGEECLAHNAC…
Orphan1	MK751499	ATGCGAAATACACTAAATGAGTCCGCTTGCGCAGCGGTACTGGAAAATGTCGATTGGCTGGAACCGAACGCCTTGGTACGGCTCACAATTTTATTGCTAATTGACGTCATGGTCATCGTTGGCAATTGTTTGGTGATTGCTGCCGTACTATGCTCATCAAAGCTGCAACTAGCTGTTACGAATATCTTCATAGCGTCACTGGCCGTGGCTGACTTGATGGTTGGAGTGGCGGTGTTACCGTTTTCATCTGTTTGGGAAGTGTTCAAGGTCTGGACTTTCGGCGATGTCTGGTGTAAGGTGTGGTTAGCTGTGGACGTCTGGATGTGTACCGCCTCCATTCTAAACTTGTGCGCCATTTCGTTGGATCGATATGTAGCAGTAACGAGGCCTATAACGTAC…	MRNTLNESACAAVLENVDWLEPNALVRLTILLLIDVMVIVGNCLVIAAVLCSSKLQLAVTNIFIASLAVADLMVGVAVLPFSSVWEVFKVWTFGDVWCKVWLAVDVWMCTASILNLCAISLDRYVAVTRPITYPSIMSRSRAKMLVGGLWVLSFVICFPPLVGWKDSKSDEESSNTTLTEDNPHCPWKCELINESGYVVYSALGSFYIPMFVMLFFYWRIYKAAVRTTQAINQGFKITGSPGNRFEQQRLTLRIHRGRGSSTRVPHGSPNGSSYTATTTSSASPSPRRNHERTHERVKISVSYPSNENLSSATSSPQLLAVTPTSPSGHPSYVVHYTVNGKESPSTKLCNRRSQVGDNDHLLKVNRCDSLQSKRRSSSVDSGRKRAPSPTPSANEDGSS…
Orphan2	MK751500	TGTTTCTGCACGGGAAAAGGATCCCAAAACTCTCGCAGAGGCTCAGATGGATCACAATTACAGGGTCGTCAATTTAGATCTCCAAGTTACAACGTACAAGTCCACGGTCATTCTCTGGGCGAGGAAAGCGATCCGGGCGGCGATCCCTCGGATTCCAGGTGA	MPEQNTSCDQRNFGNYSTMFGVTDIPEWEAVITVFTLGFIILLTVIGNVFVILSVFTYKPLRIVQNFFIVSLAVADLTVALLVLPINVVYSVLGQWVFGIHLCKMWLTSDVMCCTASILNLCAIALDRFWAITDPINYAQKRTLKRVLIMIAAVWLLSLLISSPPLIGWNDWPDTEVFLEKKECKLSSRQGYVIYSSLGSFYIPLAIMTIVYFKIFFATRRRLRERAKASKINAISKNQIRKNEEVDRDSVSSETNHNDHRNNCKNNEKKKRKNRETIEDRVQLKPILTHEDSVTDIENSSNSHKNGESSKEAPLTTKPTSPCTTMTLMRTDSKNRTSKVVVIETATKKPSGIYQFIEEKQRISLSKERRAARTLGIIMGVFVVCWLPFFLMYVIVPFC…
Orphan3	MK751501	ATGCCGGAACAAAACACAAGCTGTGATCAACGGAACTTCGGTAACTACTCCACTATGTTCGGAGTGACCGACATACCCGAATGGGAGGCCGTCATTACCGTCTTCACGTTGGGCTTCATCATCCTGCTCACCGTCATTGGCAATGTCTTCGTAATCCTCAGCGTGTTCACTTATAAACCATTAAGAATCGTGCAGAACTTTTTCATCGTATCGTTAGCGGTCGCCGACTTAACCGTCGCGTTATTAGTACTACCCATCAACGTAGTGTATTCAGTACTAGGACAATGGGTCTTCGGTATACACCTGTGCAAAATGTGGCTCACCTCGGACGTTATGTGTTGTACTGCGTCCATCTTGAACTTATGTGCCATCGCTCTCGATCGATTCTGGGCCATCACG…	MDDGSKYVRYPREATIFAASCAVVFCILGILGNLVTVLALIRCPKLRNHATTAFVLSLCISDLLFCTVNLPLTAARYIYEKWILGDALCKLFPVFFYGNVAVSVLNMVAITLNRYILISCYEYYSKLYSKISICMQLLCTWGTAFLIMLPPLTGAWGQLGLDPSTFSCTILEKEGKSPKKIIFLVGFALPCIVIILAYSCIYCSVRKSKRKLRSHQPIADARTAKREKDDNRLTKLMALIFLCFLFCFLPLMLVNVFDDSIRYPVFHVLASISAWASSVVNPFIYAASNRQYRSAYKKLLRTVKSSMAFSDSRHSNNSLRSKYEKNQSVSFRPKESSSAIDG
Orphan4	MK751502	ATGGATGATGGATCGAAATATGTCAGATATCCTAGAGAAGCAACGATATTTGCCGCTAGTTGTGCCGTAGTTTTTTGTATATTAGGTATACTAGGTAATTTGGTGACTGTATTGGCTCTGATTCGATGTCCCAAGCTACGAAATCATGCGACAACCGCATTTGTCTTATCGCTCTGTATATCGGATTTACTTTTCTGTACCGTAAATCTTCCATTGACGGCAGCGAGATATATTTACGAGAAATGGATATTGGGAGATGCCCTTTGTAAACTATTCCCGGTTTTCTTTTACGGAAATGTAGCAGTTTCCGTACTCAATATGGTTGCCATCACCCTCAATAGGTACATTCTGATCTCTTGCTACGAGTATTACAGTAAACTGTACTCGAAGATATCCATA…	MDIVERSQFSELVRYSRPMMTIAGAFTVIIMLVGVIGNLLTLMALLRHSKIRTVAAAFIASLCLSDLLFCFLVLPFSASQFFHGTWIHGEILCTMIPTLRYGTIGVSLLSIASISINRYILIAWPQLYSQIYTKTKVFMYITAIWLFSYGLQIPTLMGQWGEYGMDERLGTCSIKKDKNGNSSKTALFIIGFALPSVVIVICYSSIFWVVRKSHKRLAQHCSNDGKFKRSEMKITKMVLVIFICFVVCYLPITISKVFDPDVKHAPLHVLGYLLLYLGSCVNPVVYVTMNKQYRNAYLETIKCRYNSNLESGNTPANTPTKTQGMSVAYLKKPPHPNVH
Proctolin	MK751503	ATGGATATTGTGGAAAGATCGCAGTTCTCGGAGTTGGTTCGATATTCACGACCGATGATGACCATAGCCGGTGCTTTTACAGTGATCATAATGCTAGTGGGTGTCATAGGAAATTTGCTTACCCTGATGGCGCTTCTTCGACATTCTAAAATACGAACGGTTGCAGCAGCATTTATAGCAAGCTTGTGCCTGTCCGACCTGCTCTTCTGTTTCCTGGTGTTACCGTTCTCCGCCAGCCAGTTCTTTCACGGAACATGGATCCACGGGGAGATACTTTGTACGATGATTCCGACACTGCGATACGGGACCATCGGCGTTTCCTTGCTGAGCATTGCATCAATTTCTATAAATCGATATATATTGATAGCGTGGCCTCAATTATATTCCCAGATCTATACG…	MKDSTEIILEGSRFWFQKVLVPIMVCIGVTGNTVTVMVLTRRRMRSSTNIYLSALAIADIIHLFFVFLLSFKHYNNINDRKYELYWRFYGLSHWLCDAASSTSVWLTVSFTIERYIAVCHPMKGKYFCTENRAKTVIVIVYIFCILTTASTTFEYQLSMNDMENCTECKIDTKKLSNEDMATNLNATSSNLDGRATTHFVPNNIILAKENTSDTNQNQSTIKVFNDPHLTTVLKNILSNCTTNHPHIIYVYPQLLNITDDKSKNSGAKIETLSNMTIVHNYLNDSGQEDDNKDTSSSVFEGMSAGGGTGDANNGTAVTIKHCCTKRLWIDVESTNLGKNETYTSFMYWYSALFFGLFPLVLIATFNCFLIRAVYISQKKRRAMTNSKKVKSQDAVSSHN…
Pyrokinin 1	MK751504	ATGAAAGATTCCACGGAGATAATATTGGAAGGATCCAGATTTTGGTTTCAGAAAGTTTTGGTGCCGATCATGGTCTGTATTGGGGTAACAGGAAACACCGTAACTGTGATGGTACTAACGAGGAGAAGAATGAGGTCATCAACCAACATTTACCTTTCTGCGTTAGCAATAGCTGACATAATTCATTTATTTTTCGTATTTCTACTTTCGTTTAAACATTATAACAATATAAATGACAGAAAGTATGAATTATATTGGAGATTTTATGGTTTAAGTCATTGGTTATGTGACGCTGCAAGTAGTACATCAGTATGGTTAACAGTTTCATTCACGATTGAGAGATACATAGCCGTATGCCATCCGATGAAAGGAAAATACTTCTGTACGGAAAATAGAGCC…	MDLVNDTVCDESVYGPKRSELYIVVTITIIYVVIFITGTIGNVTTCIVIYRNKSLHTATNYYLFSLAVSDLVLLVSGLPQEIYLIWNRYPYVFGSTFCFLRGLLAETSGNATVLTITGFTVERYLAICHPFLSHTMSKLSRAVKFILFIWMVAISFAIPQAIPLKVTGRCPLCLPTEPVMNHSFEISTFVFFVTPMTLITVLYIMIGSTLRTSNLMKTRSANYRAHSKSSKKVVKMLVAVVVAFFICWAPFHVQRLYSIYATFPKPDEKTHSLYLHIYELVTYVSGVLYYVSSTTNPILYSIMSVKFREAFKETFTRCCGLGVQRPKPQRHYSTLLKNGRSGNESTDSARDDTVQTNTSLSHKNSSDSFGGSLRFKFSFRHSIKMDQGGASGKLPRPST…
Pyrokinin 2	MK751505	ATGGACCTGGTTAACGATACTGTGTGTGATGAGAGTGTTTACGGACCGAAAAGAAGCGAATTGTACATCGTTGTTACCATTACGATCATTTACGTAGTGATTTTTATTACGGGAACTATTGGTAATGTGACCACTTGCATTGTGATATACAGAAACAAGTCTCTTCATACCGCGACCAACTATTATCTGTTCAGTTTAGCGGTATCTGATCTGGTGCTTTTGGTATCTGGTCTACCACAAGAGATTTATCTCATCTGGAATAGATATCCTTACGTCTTTGGAAGTACATTTTGCTTTCTTAGGGGATTACTAGCAGAGACATCCGGTAATGCTACGGTACTAACAATAACTGGCTTTACAGTTGAGAGGTACTTGGCTATATGTCATCCCTTTCTCTCC…	MASMEKDLQFAADQQRHIYLTAMTTTTPSPNNDSFNVTAYTTDNFNDFMYPLELVIPFTIVYAIIFFTGVIGNISTCVVIAKNKSMHTATNYYLFSLAVSDMLLLISGLPPEMYRIWSPDTYIFGHILCFLQGFSAETSANATVLTITAFTVERYLAICHPFRSHKMSKLSRCIRIIIIIWAIALALAIPQAAQFGIDVSFENGKYSSHCTVVWKIFAHAFEVSTIVFFVTPMIIITVLYLLIGRQLKKSTAKRPSLTSHNSNSTSTGYSCHNNDIARRRRQTQAQNRVVKMLIAVVAAFFVCWAPFHAQRLLAVYLAEASPEAQNTYFQMYLYLMYTSGVLYFLSTCINPLLYHIMSNKYRNAFKKTFHNFCSSSKNRTRNYAAAPLRLASKKAPDNF…
RFa peptide	MK751506	ATGGCGTCTATGGAGAAAGACTTACAATTCGCTGCAGACCAACAGAGACATATCTACTTGACGGCCATGACCACCACCACGCCAAGCCCGAACAACGACAGCTTCAACGTCACCGCGTACACCACTGACAATTTCAACGATTTCATGTACCCCTTAGAACTGGTGATTCCGTTCACGATAGTGTACGCCATCATATTCTTCACCGGCGTTATCGGGAACATAAGCACGTGCGTGGTAATCGCGAAAAACAAAAGTATGCACACGGCTACGAATTACTACTTGTTCAGTTTGGCGGTTTCCGACATGCTCCTGCTGATTTCGGGACTTCCTCCGGAGATGTACAGGATTTGGAGCCCGGATACGTATATTTTCGGTCATATATTGTGCTTTCTTCAAGGA…	MSSYDDLNDFDGTLIFPWSELVPVLVVYGFSFILGLTGNCLIIFTTFRYRRMRSVTNIFLSSLASSDLLLIIFCIPVKVAKLFSFTWTMGLTLCKSVHYMQNLSAICSVLTLTAISIERYYAIVHPMKSKYVCTLRQAKSIILVIWVMSILLAIPALVIWVQTPVGEHGEYFWCIKDDSNTMLWKIHEIYLLMLVLIIPFSIMAYSYTFICCEVWKVMEHRCLMTNNQSYENACFKHQNFPFGSAIQSRDNKKGRTKIKNCRDDTNMVKQVIYMLVTVVVLFAICWTPLLIDNILTAYGVLSQERSGIFKYMLTTFHLMAYFNSCMNPIVYGFMSKTFRESFKLALCCSSDPRSYIRRTGSNYSMRFISRNGSQTKTTPDSKRQETTSLCVT
Sex peptide 1	MK751507	ATGTCATCTTACGACGACCTTAATGACTTTGACGGCACACTAATATTTCCTTGGTCGGAATTGGTACCGGTTCTGGTTGTATACGGGTTCAGCTTCATTCTAGGCCTAACGGGAAACTGCCTCATTATTTTCACCACTTTTCGCTACCGAAGAATGCGAAGTGTCACCAATATCTTTCTCTCCAGCTTAGCATCATCTGATTTATTACTTATTATATTCTGCATTCCAGTCAAAGTTGCGAAATTATTTTCATTTACTTGGACTATGGGCTTGACGTTATGCAAAAGTGTCCACTACATGCAAAACTTATCAGCAATTTGTTCCGTGTTGACTCTGACAGCAATCAGCATAGAGAGGTATTATGCTATTGTACACCCAATGAAATCGAAATATGTATGT…	MDPTYSTRSSLRASLNNNNLTYFRHLITELLPNKKANVSDDFVEKVLTILKQKFATMGDESSWTTSNETQSWFCGETIKSWTSAYADTYHAHFAITICFFGILTNSFNIIILTRKDMAAAPINRILAALAWADMFLMLEYIPFAYYYNLEIKKNMDFPYYGAVYTLFHTHYALILHTVSICLTLTLAVWRYLAIGFIEKNHILCSHHRCTLAIIISFILPLFLCMPQYPALTIKSTVVEEQNVNYTLYHVQLSDLVEKHKTLLKVNFWLFGIFLKVLPCLILMVISIWLIRTLFKAKKGRQVLKSQDNNFLITPSREQNKNSTKYERRADRTTKMLVVILILFLVTELPQGLFALGIGLTGKDLFLTCYQSYGEIMDILALLNGSINFLLYCCMNRMFR…
Sex peptide 2	MK751508	ATGGATCCTACGTATTCGACCAGAAGTTCGTTAAGGGCGTCATTGAACAATAACAACTTGACTTATTTCCGACATCTCATCACTGAACTATTGCCGAACAAAAAGGCCAACGTTTCCGATGACTTCGTCGAGAAGGTTCTCACCATTCTGAAGCAGAAATTCGCCACTATGGGCGACGAGTCCTCCTGGACGACATCCAACGAAACTCAGTCGTGGTTCTGCGGCGAGACGATAAAGTCTTGGACGTCCGCTTACGCTGATACTTATCACGCACACTTTGCCATCACCATTTGCTTTTTCGGCATCCTTACGAATTCCTTTAACATTATTATATTAACGAGGAAGGACATGGCTGCCGCTCCTATTAATCGTATATTGGCAGCGCTGGCATGGGCAGAT…	MTNYTYCDLEHFRKHYKENVHGYLSLTVCVLGSIANIFNICVLRTKQMRSPTNYILTGLAIADLLVMLQYIPFTIHRNLPPSPLYYTHFNYYWAVYYKFHSLFTLILHFIACCLTIILAIWRYVYVSQLHASKICSDQKKTFTVIILTYILCPILCSPIFTTIEITGYNHTCDLNGIIVEKREKSKYNVSELKNETIFVLRPNDPLQLSVWLYSLLLKLLPCVLLTVLSYKIIAALIETRRRRIKLLGSPLEDMSRNTKPNTIQLYKETQADRTTKMLLAVLLLFLLTEFPQGILGQISALKGEVFLVECYSALGEVMDILALINSSINFILYCTMSRQFRVTFQELFHIKEITNWLYAKRTSQKNLQEENGVETKMSLV
Sex peptide 3	MK751509 MK751510	GGACTTCTCACCGGCCTCTTATCGCCTTGTGTCAGTAGCGAGACTCGGTCCGTGTTTACGATCGTCAGCTGATTAGTTTCATTCATAACAACATCAACGGTAGACAGACGGTGGTTTTGTGATCGGAGACAGATGATTTGTTGCGTTGAGTTTTGACTTTTACTGTTCAGTTGAATCACTGTGTATGATATAGAGAAGAAAAGTGACCAGTGTAAACTTGTTAATATCTACAGTGATGGACAAGAATATATAGCAACAACTCTATTAAAGTGTGAGAAATAAGCAACACAATGAACGTCAGTGCGAACGCGACCTTCTGCGACTTGAAGCAGTTCAGCAAAGACTTTCGCAGTTGTCACATATACCTCAGCTTCATAATCTGTATCCTAGGTTCAATCC…	MNVSANATFCDLKQFSKDFRSCHIYLSFIICILGSILNILNICILSTKQMRSPTNYILTSLAIADVIVMFEYMPFAYMQDKRTAYYSYGFSSFIIFHAVFTNAFHFISCCLAIILAIWRYIAVKFP CAFVCFPLVLSLKINSSLAYKKPDGSIVFVKPQDIAVENITIYLTAYRNSIFKNISFYVYGVVLKLIPCILLVVLSTLLIIELFKAQQRKKALHTSNKDTRLIKKKLNQKHVDKEKQFNRTTKMLVVVLLLFLMAEFPQAMMGLLLHILGDKFYTECYMPLGDLLDIFTLTISAINFFLYCIMSQKFREVF
Sex peptide 4	MK751511 MK751512	ATGGCCCGGCCGACCGTTCCAACCGTCTCGGTCCGGGAATGGTAAACGAAAATCGCGCTAAATATTGAAAGGAGACAATTCGATTTCGCCATTGATCCTCGACATGCTCGCAGTTCTATCCAGTTAGGAGCAGTGGCCGCCATGGAGGACCGAGACGAAAACAGTTCGTTCATCAATAATCTAACGAGATTCGATCAGGATTACATCAATGTCACCAACGAGATGCCCATCGGTTACGCGGTACCCCTGTACGGATATTTCATGCCTTTCCTCTTAGTGGTGACCATCGTGGCTAATACTCTGATAGTGGTGGTGTTATCCAAGAGACACATGCGGACTCCTACGAATATAGTGCTGATGTCCATGGCTCTCTGTGATATGTTTACGCTTTTAGTACCT…	MARPTVPTVSVREW*TKIALNIERRQFDFAIDPRHARSSIQLGAVAAMEDRDENSSFINNLTRFDQDYINVTNEMPIGYAVPLYGYFMPFLLVVTIVANTLIVVVLSKRHMRTPTNIVLMSMALCDMFTLLVPAPWLIYMYTLGNHYKPLHPVPICYTWSIMHEVLPNLFHTASIWLTLVLAVQRYIYVCHAPQARKFCTLPNVYKCVGYTLFASALHQAPRLFDTQYSLATTTWNNQ LDVCVKSYATWVQNFITIDGYFIFYYVFRLIFVHMLPCIALVTLNLLLFRALKQAQKRRDILLSSKKNQKNECKKLRDSNCTTLMLIVVVSVFLLVEIPLAVVTMLHIISSSIIEFLDYEVANTLIIFTNFFIILSYPINFAIYCGMSRQFRETFKELFI…
Short neuropeptide F	MK751513	ATGCCCGTGGTCGACGCCATCAACGTGACCACCGTTCACAAGCTGGACATAATCGACAAGAAGGGAGTGCAAGTTCTGTTCCTGGTGGCGTACACCACCATTTTCGTGGTGGGACTATGCGGTAACGTGCTCGTGTGCTTCGTGGTGTTTCGCAACAAGGCCATGCGGACTGTTACCAACTTGTTTATCACTAACCTGGCCCTATCCGATATACTCTTGTGTGTGCTGGCGGTACCGTTTACTCCTCTCTACACGTTCTTGGGCAAATGGGTCTTCGGCAACTTGATTTGCCACATGGTACCCTTCGCTCAAGGCACCAGTGTCTATATTTCAACGCTTACATTAATGTCAATTGCTATAGACAGATATTTTGTGATAATATATCCTTTCCACCCACGT…	MPVVDAINVTTVHKLDIIDKKGVQVLFLVAYTTIFVVGLCGNVLVCFVVFRNKAMRTVTNLFITNLALSDILLCVLAVPFTPLYTFLGKWVFGNLICHMVPFAQGTSVYISTLTLMSIAIDRYFVIIYPFHPRMKLSTCVAIIIIIWIFAILVTSPYGIYMKHVQDPHNFTRHYCEEDWPVEQWRAAFGVITAALQFLIPFLIMAYCYICVSIKLNDRARTKPGSKNSRKEEADRERKKRTNRMLIAMVAVFLLSWLPLNVINIINDFNKDMISWEYYFLSFFLVHQMAMSSTCYNPFLYAWLNENFRKEFKQVLPCFDASIVRVPSNSRFTNWRSERTCNGNEAYGNNETQQETLLSSQIHRAPSLKEKKLTPPPLKTDSVEVENIIVPNMGVGVEYD…
SIFamide	MK751514	ATGGGCGAGCTGACATTCGGTCCGATGTTGCATCCCGAGGGAGAAGAGATGTCCGGCTTCGAGGATCTGCTACGCCTGGTCACCGAGCTGTACGACGGGGCTAAATCGTCGGACTATGTGGCAGGGTACCCTGATATCCCGCAGGCCTCAACATCTAAACGTTTGATGCCAATCGGCGTCCGTTCCCAGAATGGCATTTTGCTCTACAATTCGAGCATCAACAGCACGGAACCCAGCATCATGCCCGAGTTGTTCTATCGTCATTCCGCTGCCATGACGGCAGTGTACTGCGTAGCTTATATCCTGGTGTTCGCCGTGGGCCTCGTGGGCAACTTCTTTGTGATCGCCGTCGTTTATCGATCTCCACGAATGCGAACCGTCACCAACTTCTTCATCGTC…	MGELTFGPMLHPEGEEMSGFEDLLRLVTELYDGAKSSDYVAGYPDIPQASTSKRLMPIGVRSQNGILLYNSSINSTEPSIMPELFYRHSAAMTAVYCVAYILVFAVGLVGNFFVIAVVYRSPRMRTVTNFFIVNLAVADILVIVFCLPATLMSNIFVPWVLGWWMCKTVPYIQGVSVAASVYSLVAVSLDRFLAIWWPLKCQITKRRARLMIALIWTVSLTATIPWALFFDLVVIFSDAPDVQLCLEVWPEPMNGSLYFLVANLLFCYILPMILITMCYVLIYVKVWKRHIPTDTRDAQMERMQQKSKVKVVKMLVAVVILFVISWLPLYAIFARIKLGGEIAPWEEEVLPIATPIAQWLGASNSCINPILYAFFNKKFRKGFAAVLKSRRCCGRLRYY…
Sulfakinin	MK751515	ATGTCGGCAAACTTCGACCTCCAGTTTCTAAATGCCAGTTGGTCATCTGATCTAGTAAATTGGACAACGACAGCCGTTCCACCGAGGAATAAAATGCTCCCCTGGTACGAGACTGGAAAATTTCAAATACCATTTTACGGAATAATCTTCCTGTTAGCTGTAATCGGGAATACGCTGATAATATTAACGTTGGCGCAAAATCGTCGCATGCGAACCGTAACCAATTTATTTCTGCTCAATTTGGCCGTATCTGATCTTCTGTTGGGCGTTTTTTGTATGCCGTTCACGCTCATTGGAGCTCTTTTGCGAGACTTTGTATTTGGAGAGGCAATGTGCAAGCTGATACCGTTCCTGCAGGCTTGTTCGGTATCAGTCGGGGCCTGGACCTTGGTTGCGATT…	MSANFDLQFLNASWSSDLVNWTTTAVPPRNKMLPWYETGKFQIPFYGIIFLLAVIGNTLIILTLAQNRRMRTVTNLFLLNLAVSDLLLGVFCMPFTLIGALLRDFVFGEAMCKLIPFLQACSVSVGAWTLVAISVERYYAICHPLRSLAWQTISHAYKTILAIWVGSFLCMMPIALLSRLKPTKLGNHKCREDWISLEYEKAYNLFLDLILMVFPLAVLAVTYSLIIRTLWKGIKTERAQRAQATSSVDVYVHLQGTSTTTWSTRNRATVRQPQWKTVRNWSDDSNSLVSSNGSRKLITGLRRTNAERSLCNKKRVIKMLCVVVLEFFICWTPLYIINTVVLFDKDFVYNNIGYTGISFLQLLAYTSSCCNPITYCFMNCGFRKSFLKLFKCFRPPPDN…
Tachykinin-related peptide	MK751516	ATGAATAAGACGATATATCATTGGGAAAATCAGCTAAATTACTCTTTAGCGAACAGCTCGGAGCAGTACACCTACGGCAATAATTATAGCCAGGAAGATAGGAATCAATTTATCTTGCCGGTGTGGAGACAGATTTTATGGAGTATTTTGTACGCGGGAATGGTCATCGTCGCTACCGGTGGCAATTTAATCGTCATCTGGATCGTTCTCGCCCACAAGCGCATGAGAACGGTCACCAACTACTTTTTACTGAACCTATCTGTAGCCGACACAATGGTCTCCACTCTGAATGTCACCTTTAACTACGTGTACATGTTGTATTCCCACTGGCCCTTCGGCGAGCTGTACTGCAAAATAAGTCAGTTTATAGCCGTGTTGTCCGTATGTGCCAGCGTATTT…	MNKTIYHWENQLNYSLANSSEQYTYGNNYSQEDRNQFILPVWRQILWSILYAGMVIVATGGNLIVIWIVLAHKRMRTVTNYFLLNLSVADTMVSTLNVTFNYVYMLYSHWPFGELYCKISQFIAVLSVCASVFSLMSISIDRYMAIMTPLKPRMGRMVTLVLALFTWILGILIGMPSLLFYKTYRNIYLNGEERVICYQEWPDGMGSESIYEYYFNVAFLIITYLVPILSMTYTYARIGIELWGSQSIGECTQRQMDNIKSKRRVVKMMMVVVIIFAVCWLPYQLYFIVISYFPEITNSEYIQETFLAIYWLAMSNSMYNPIIYCWMNARFRRGFKQFFSCLPFVHVSPGALTRREVLTSKRRSYSGSPDHNRIVRNGTVRMSFTPYTTMGGRPSPSSS…
Trissin1	MK751517	ATGGATTATAACGAGACGTTACAGCGATTTTTAAACATCTCCGATAATGCGATGTCGACGGCCGAAGGTCAAGAATATATTTTCGATAAAACCTACATCAGGGTGATCTTTATTATACTCTACACCCTCGTTTTTTGTCTGTGCTTCTTTGGTAATCTATTGGTGATACTTGTGGTCATGTTAAGCCGAAGACTGAGGACGACCACCAATTTTTTCCTTGCCAATCTGGCGGTTGCCGATCTCTGCGTCGGCATTTTTTGCGTTTATCAGAACTTACTTATTTACATTGTGGAGAGTTGGATTTTGGGAGAGTTTCTGTGCAAAATGTACGTCTTCATACAATCATTTAGCAATTCCGCCAGCATTGTTATTCTGGTGGTGATTTGTACGGAGAGATAT…	MDYNETLQRFLNISDNAMSTAEGQEYIFDKTYIRVIFIILYTLVFCLCFFGNLLVILVVMLSRRLRTTTNFFLANLAVADLCVGIFCVYQNLLIYIVESWILGEFLCKMYVFIQSFSNSASIVILVVICTERYFAILYPITSKQMLTTVRLKIIILVVWIMCILYSSPKFYWGNTVTVTTESGNETVCVLNRQKFNSELFDIIHFILLYLIPLAIISLLYTRIAICLWNSSEQLKQQLDASIPVSRYESIKRKSPKIYKLDKKRSNLSETNLQTSTNSKQNLNLTENVLKARRGVIKMLIIIVCAFALCNLPFHARKLWQYWSPNYQGHTNFSALLTPLTFLSTYFNSGVNPLLYAFLSNNFRRGMREIILCSSKKYSIRAINSNHHRATIRRALHSDT…
Trissin2	MK751518	GAAAAATTGATAAGACATCAATAGCAACATGTTTAATTAAAGAGCATTTATATACAAGAATAGCTGTTTGTTTATGGAACAGCTCTCAGCAATTGAAGAAACAACTAGACGCTTCATCTAACACCAGTCAGTATCAAGCGCTTTGCCAAAAATCAACGAGACAACGTAGCGATCGCTCGATCTCATCTAATGGAACTTTACACCAAGAGACAACGATATCAACAACTCCCAAACAACAGCTGCAACCCAGAACTTCAAGTAACTCATATCAAACTGTCGGTACAGGAGGAAGCCCTACTTGCAGTGAAAATGTTCTTCGTGCAAGAAAAGGAGTCATTAGAATGCTTATAGTAGTGGTAGTAGCATTCGCTTTATGCAACTTGCCATTCCACGCTCGCA…	KIDKTSIATCLIKEHLYTRIAVCLWNSSQQLKKQLDASSNTSQYQALCQKSTRQRSDRSISSNGTLHQETTISTTPKQQLQPRTSSNSYQTVGTGGSPTCSENVLRARKGVIRMLIVVVVAFALCNLPFHARKMWQYWSSDYHGDTNFSALLTPLTFLCTYFNSGINPLFYAFLSKNFRRGMREILFCSMQRKKRRSSARHHMSLRKPEGIFHRQSSTRSTLKGNNVTTVTVVQECSSDEV
Inotocin (Vasopressin-Like)	MK751519	ATGAATTCGACCGGCAGCGATACCACGACGCAGGAACTGGTGCTCGGTACCGAGGATTTCAACACGGGACGTGATGAGAACCTGGCCCGTATAGAGATCGCCACGCTGGCTTTGATCTTTCTCACCACCGTCTTAGGAAATGCCACCGTTTTGCTCGCCTTGTGGACAAGGAAAAGATACTGCGGCCGGAAAAAGCTGTCTAGGATGTATTTCTTTATACTCCACTTATCTGTGGCCGATCTGATGGTCGCTTTTTTCAGTGTGTTACCACAGCTCGCGTGGGAAATAACCTACCGATTCCAGGGAGGTTTTCTCCTCTGCAAGCCTGTAAAATATGGTCAAATGCTTGGTCCCTATCTTAGTTCTTACATTCTGATGGCCACGGCTCTGGACCGGCAT…	MNSTGSDTTTQELVLGTEDFNTGRDENLARIEIATLALIFLTTVLGNATVLLALWTRKRYCGRKKLSRMYFFILHLSVADLMVAFFSVLPQLAWEITYRFQGGFLLCKPVKYGQMLGPYLSSYILMATALDRHQAICYPLTYCSWTSRRSKAMVYVAWVASLLFCIPQVTVFSYQEIVPNVYDCWATFQKEWGEQAYVIWYSVSIFIIPLLVLMYTYGCICREIWRCSESSLRPRNSQKNTKKNRVPLISRAKINTVKQTVAVIVMYIVCSTPFIVAQLWATIDPTSAFLQGSTFTILTLLYSLNSCVNPWIYLSFNRELPRLLVRHLIASNKNYRTTTEGQSNSSCEQMTSLKLSRHVPSRSAINGRRWMVTAT
Orphan5	MK751520	ATGACACTGGTTCTGTCGATAATTTTAACCATACTATGCATTATTGGAATAGTATTTAACGTCTATGTTGTTTTGATTATAGTGTTGACAAGACAGGTTAACACTGCTAATAATATTCTTCTGTTACATCTTGGTGTCTTGAATATTCCATTTGGTATATTATTCCTGCTTTTCTGCATACCAGGAATAAAAGAAACTCAATGGATAATAACAGGACTACCCTGTACAGCCACAGGATTCCTGTTCACCCTAGTCCATCCTTTAATTTTGTGGACAATTTGTGGCCTCAACTGCGATCGATACTATGCAATAGCAACACCACTACATTATTCAAACATCATCAGCACACAGAAAGTTATCTCTGGATTGATCATTGGCTGGATCAACTCGTTCATTCTC…	MTLVLSIILTILCIIGIVFNVYVVLIIVLTRQVNTANNILLLHLGVLNIPFGILFLLFCIPGIKETQWIITGLPCTATGFLFTLVHPLILWTICGLNCDRYYAIATPLHYSNIISTQKVISGLIIGWINSFILSIPPLVSISSYKYADGPGICMPDFSDGKHAFGYALTYTSFTLILPTTILICCNIKILIIARYHRHRIASAIYEVTLSAQVTITHQRNPFFVPTVTAPSAGGPKFRGPNAIYSVFILVGSFLMMHVPYYVLIMSETTMQIAHNGSMEHSINLFYVAAGTLLICSPAVNGYLYGLKNKSLKKAFTNYWRKKQTKNEVNHEIQARTPSTCGSRRPSLTPFGLFAKTNAVPRRMSETLIDVNRSLRNSTNRAKIKRITSDLMWRPTSANS…
Calcitonin	MK751521	ATGTATAGAAAGAGTGTTGTTCATGTTTTACTTGCTTTTGTTGTGTTTTTGGCAACAGTAGGATTACATCTAAATACAGCATTACCAAATATAGATTATCAAGACTATATACCTGCAGGAGAGGATAATGTAACAAAACTATGTTTAGTCAGAGAATCGGTTGTATCACAAGTTTTGTGGAACCACAGAACAGGATTTTACTGCTATAATTATACAAATAGTGCTAGATTCATTCAAAAATTAAATTATAAATCCATGTGGTTCTATTGGGAAACCTATAACGCAAATATATCCCTTCCAGTTGCAATAATTAGCGATACTACAGTAGCGTTATTCGACTATCGTGATGCGGATTCCTTAAAACTGCTCCGGAAATCATTTATGTCCGACGAAGTATTC…	MYRKSVVHVLLAFVVFLATVGLHLNTALPNIDYQDYIPAGEDNVTKLCLVRESVVSQVLWNHRTGFYCYNYTNSARFIQKLNYKSMWFYWETYNANISLPVAIISDTTVALFDYRDADSLKLLRKSFMSDEVFDNYVKCCRDAEDCCNNYMTDTNIYGDEKHCPVIWDAWSCFPKTPVDTTAEMPCSSQAYQSPDKVCTLKSKKDCLYNEQLRIGTWNQQTNYSTCAIAPVYLRRHNFHVIFLFVCIACSFPAIIIFLAIPSFRELTRVILHRNLLIAIVLRNIMTIIFKKLVIIDALLSSDLTNHVMELNSVGCRILSFLVSSSTNSTYACMLIDGYYLHKVIVRTFAKEPSIWILYIVVAALTFIPSIIWAGIMVNFEATDCWAVDRNGAQWSVDSF…
Diuretic Hormone 31	MK751522	ATTTCCTTGGCGCTGCTGTTTCACTTCAAGTCGTTACGATGTGCCAGGATCCTAATCCATATGAATTTATTCGCATCGTTTGCCATCAATAATTTTTTATGGCTCTTATGGTATTACCTGGTTTTCGATGAGACTGAAATTTTTATAAACAATAAGTTCTGGTGCATCGCCCTACATACTGTGCTATACAGCTGCTTGATCTCAAATTACTCTTGGATGTTATGCGAAGGAGTTTATCTTCATACAGTTCTGGTATGGGCCTTTATTTCACAGAGCAGTCTGTTAGCTTGGATGATGGTAATCGGATGGGGGATCCCTCTAATTACCACACTGATCTACGTCCCAGTCCGAGCAAGATTCGGTGAAGGAAATGAGCTGAAGATGTGCTGGATAAAGGAA…	ISLALLFHFKSLRCARILIHMNLFASFAINNFLWLLWYYLVFDETEIFINNKFWCIALHTVLYSCLISNYSWMLCEGVYLHTVLVWAFISQSSLLAWMMVIGWGIPLITTLIYVPVRARFGEGNELKMCWIKESRFDIIQQIPVAATIFLNLIFLINIVRVVVVKLRMGPANDGQGGGGGASRSTLQALRATLLLVPLLGLNFLLTPFRPQGGHMWENLYDLVSAITTSFQGLCVAILFCFCNGEVQAQIKRKWRTATFRPRANSCTVTTVSFVRSSYPHNGEEKV
Diuretic Hormone 44	MK751523	ATGAACCTTATGTGGTCATATCTTTTGACCTACGTCACATGGATCATATTTCTGATAGGAGTAAATTTTAGGGAACAGATGGCAATAATGTGCGTGTTCCTCGTTACCCTTCTCCATTATTTCCACATTACGACCTTTTTTTGGATGTTCGTAGAAGGTCTCTATTTATACATTCTGGTTGTGAGAACACTGACAAGGGAAAGCTTTAAATTACGCGTCTACCTGGCTATAGGTTGGGGGACTCCATTATTCTTCATTATTGTTTGGGCCGTACTGAAAACTCTTATACCGCCACCACCAGATCCATCTGATTCGTGCCACTGGTTCAGGGACACCAATCTTGACCTTCTGTTTCAAGTACCTACCATAGCCGTCATCTTCATCAATATTATCTTCATG…	MNLMWSYLLTYVTWIIFLIGVNFREQMAIMCVFLVTLLHYFHITTFFWMFVEGLYLYILVVRTLTRESFKLRVYLAIGWGTPLFFIIVWAVLKTLIPPPPDPSDSCHWFRDTNLDLLFQVPTIAVIFINIIFMISIMVVLVTKLRSANTLEIQQYRKAVKALAILIPLLGVTYAITIYAPAFSIWEIFRSVLLSLQGCMVTLFYCFMNAEVQNTLRHHFQTWKTKKSLRQNRLRSSSRSKDWSPRSRTESLRFDVPHSRRITECTLVGADEDLDDDDERHSAKLRASPLNQTKESLLPNSRKESFSREPLLRRFSNESVNVAHQHSHNALHPGRKCNSDVQVNKDTLNPNAVFCTQRKESLVNQPLLEQSEDSPTAAESKIADFGGLLYPRVAVMVDER…
Pigment-dispersing factor	MK751524	ATGGGAATGGAAAATGGTACATTTTGCCCCACATCATGTGATCAATGGTTGTGTTGGCCACAAACGGCAGCGGATTCAACTGTTTCTCTACCATGTCCAGACGAAAAGGGTATATTAGAGACCGGTTGGGCATACCGTTATTGCACTATCGACGGCACTTGGGAGACGAAAAACAACTCCGACGGAAGAATAACGAATTACACACATTTTGAACCATGCATTTTACCACAGATTCAGGACATGACCAACATGTGTAATTCTTTTGGAATCAAGGCATGCCAAACGATAGGAAGAGTAACACGTATTATCGAATTGGTTGGCCTGTCATTGTCGTTCATATCACTGTCAGTATCGTTGTACATTTTCTTGTCTTACAGGGTGTTGAAAAATAATCGCACT…	MGMENGTFCPTSCDQWLCWPQTAADSTVSLPCPDEKGILETGWAYRYCTIDGTWETKNNSDGRITNYTHFEPCILPQIQDMTNMCNSFGIKACQTIGRVTRIIELVGLSLSFISLSVSLYIFLSYRVLKNNRTKIHINLFLATILQVTFRLVKYIDQELDENRQFLSEEYHLQKASTVLLEYAKTTMFTWMFIEGLYLHNMVTVTVFQEHLHIKFYIWAGWIIPAIMTLIWLGVMIAKNIRRTWFYYYFLPYYWILEGPRFVLILINLIFLLRIIRVLVVKLRQSRSSELEQIRKTVRATILLLPLMGSAHILFLVDYHFKTAWKFGLWSYTTYFLNTFQGTFVAVFYCFLNGEVQTAIRNKYSLRFNLRNSDNSHCVQFTRISNAGTDEANYSTRQSC…
Orphan6	MK751525	ATGAACAGCACCGACAAAATCCACCATATCATCTCGCTGGTGCGGCAGGAGTGCGCCTCGAGGGTCGGTCTAGATGTCGACGGGATAGCAGGATGCGGGAAGGTGTTCGATGGGCTCTATTGCTGGCCGCCGGCTCAACCCGGCACTGTCGCGGTGCAGAGTTGCAACAACAAGTTAATTAAGGCCGTCAACAAGACTGGATTAGCTACGAAGCAATGCACGGAGAACGGTACTTGGTACGTCCGGGAAGATCTGGGAACGCCGTGGACCAATCTCACTCAATGCGGATCGATCTATATCATAGACGACTTCGATGACGATAGCAATTTTTACGACAAGTGGTTGCCGATCATCAAGAACACGGCCTACCTCGGCTATTCGGTCTCTATGCTGTCTCTG…	MNSTDKIHHIISLVRQECASRVGLDVDGIAGCGKVFDGLYCWPPAQPGTVAVQSCNNKLIKAVNKTGLATKQCTENGTWYVREDLGTPWTNLTQCGSIYIIDDFDDDSNFYDKWLPIIKNTAYLGYSVSMLSLVISLIIFINIKRLHCERNKLHMHLFISYILRASSFVLKDMLFVEGAALFSDVEYINDEIIPTYTWSCKLFISVRYYLIICNYAFMLMEGLYLHNLIFLNLFSESHGTTIYCFLGWVTPLFFIVPWILLRLFFEDTLCWTQNEQKLIKLLLEIPVRISVMVNFILFTLIVRVLVLKIHFTSTFIQQKKIKYRKLLKSTLILIPLYGIPYTISFILSFYAYDNRILEIFWVFFDQAFASFQGCFAALVYCLFNSEVQSEIKRKYSYIY…
Leucine-rich Repeat-containing GPCR – FSH	MK751526	ATGCTTTACACTCTCCTATCGATATGGTTGTTATCGGTCAAGAATATCAGCGGGACCTTTAACATGGATTACTCGGCGACCGAGCAACCACCGGCGCCGTTCAACTGTTCGGTGTACACACACGAAGAGGAATTCGAGGTGCATTGCCGCGGCAACGGCCTGACCGCCATCCCCTCCAACCTCAACGCCAGCCTCAACAAGCTCATCATCTCGGAATCAAGGGATATTACCGTGGTCACCAGCAAGTCCATGGAACCGTACAAGGCTCGTTTACAAGACGTGGTACTATCGGATCTTCCCAACCTTCGTGTGATCGAAGAAGGCAGCTTTTCCAACATTTCCTCCCTTCGAACCATTTACATATACAACACACCACAAATCAAATTTATCTACGGTCTG…	MLYTLLSIWLLSVKNISGTFNMDYSATEQPPAPFNCSVYTHEEEFEVHCRGNGLTAIPSNLNASLNKLIISESRDITVVTSKSMEPYKARLQDVVLSDLPNLRVIEEGSFSNISSLRTIYIYNTPQIKFIYGLLKGVTSKHFRSLRIVNTGLHEVPELFYLSPENTLFLLDLDHNKIEKLTRNSIRVTAQQVTLNFNEIGKIEDYAFNGSEIGKLHITGNPKLTELGEFAFGGIRNLRELDLSQTSITILPDVGLELLEKLKIRDTPSLHIIPSLYDMQGLRTAKLTHHFHCCAFKYPQEHNPTKHAAYQTSMRQACIKNQIMDKTKELTKMKRSIRYPNYDQDQFPLEKTMKSPNAQIPLTGQFIGHQEPRETIDEVEEDLYEDFGVFHSSPTMINST…
Leucine-rich Repeat-containing GPCR - LGR4-like	MK751527	ATGAAGATATTCTGGGTTTTATCAGCCATTGTGGCGCTTGCGTACGCCTTGCCTGAGATCCCAGTTAATTGTGTTCGATCCTGTAAATGTTTGGAGGTAGTTCCAAATATTGTACAAGTCACTACCTGCGATTCCCCAATTACCGTTAATTCGGCGTTTCTTAACCACCTGAACAAAACAAGCGTTACTGTCATATCGTTCGCTAATGTCATTATTGAAAATATTTCGGAAAATGCGTTCACACAAATTCCGCTTTTAGAAGATATTGTTATCGAAAATACTAATATCGGACATATCGATTCTAAAGCTTTTGATAATGTTAAAAAAGTCAAACTGGCTAACTGTGCCATCGAAGACTTTCCAAATTTAAAATCAGAAAAATTGGAGGAGTTACATTTT…	MKIFWVLSAIVALAYALPEIPVNCVRSCKCLEVVPNIVQVTTCDSPITVNSAFLNHLNKTSVTVISFANVIIENISENAFTQIPLLEDIVIENTNIGHIDSKAFDNVKKVKLANCAIEDFPNLKSEKLEELHFGNCKLLDIPPLENLFSLTFLNLSVNYIKNIDIMAFAELFDLDTLILSNNEITKIPSNVFINNRALNSLYLDNNPLKSFSLNTSNNLETLSLRNCYLTEFDYHSSSKLIMLNELNLRNNKIRILKSGDLSSMKQLTVIDLSANNLIQVDNDAFAGNPKLNKLILDDNKFDQLPNFTLANGENFEMYTFSCENCEIQTIHKDTFKYMPALDNLNLGHNKLKSLSDSFNYITSLRLLDVSYNNITNLSELSFEHNVNLENLNIAGNPLL…
Leucine-rich Repeat-containing GPCR - Burs-like	MK751528	GTCGCGACGCAACTGTGGTGCGCGATCGACGGCTAAAAGATGCGGCGCTCGCCGCCTAGCCAGACTTTTGCGCGAACACACGCGAAGTGTGCCTTGGACGACGATAAGATCACCTTCTGTTGCCGAAGATGTGTTCTCGTGATATTCTGGATATTATCATTTTTAAACAGTTTAAGTCAGTGTCACGCATCAGTTGTCGGTACCCAGGAAACGTTGATGCCTTGCCCAGTCTTCGGCGAGGACCGATGCCGTTGTACTCCAGATCTTCATGAGTTCCAATGTAGAGGAGCTGGATTTACAAACATTCCACTATTGCCATATTCTATTACAAAACTAGATTTAACTAGTAACAACATAACAATTTTAAATGAGACGTCTCTATCGCACTTTCTACATCTT…	MPCPVFGEDRCRCTPDLHEFQCRGAGFTNIPLLPYSITKLDLTSNNITILNETSLSHFLHLEDLTLSDNKLERIHSKTFAKNIQLKRLILQNCGLKAIPSDALKSLVKLQTLQVGSNVIPDIDDDTFRATPHLRSLRLDGNQLRRVPTRALAALPRLEILNLGNNLIPRIAVGAFPVMNSILILLLKRNKIVDIDDMAFSNLTSLRILELDNNFLTQIPLAITKLPDLQELSISGNRIKYITGGLLQQTPALELLELKGNPLVAVDSNAFSHLPRLRRLVLSDARKLSTFPNLNGTSSLEVLRLDRAGLSIVPSSLCTFCPKLKNLDVKSNKLTMVPEINECHEMRVLDLASNHIRSIEGKRFRGLYQMHDLLLSHNHIQYIPHDAFYNLSKLQVLDLE…
Leucine-rich Repeat-containing GPCR - LGR5-like1	MK751529	ATGTGGTTGTTTTTAATAATTGGGGCTCTTGCAGTAGCATATTCGATAGCATGTCCTGATGGGTGTTCCTGTGATTTGGAAATAATTGACTGTATGGGGTTGGACCTTTCTAACCTCCCTGAAGGAATTGACATAAACGTTACAGACTTGGACGTATCATGGAACAACTTTACAACTATACCCGATCAAATCAAGCAATTCTCGGAATTGCGTTACTTTAATATATCCCACAACAGAATATCGACGCTGATGCCAACGGATTTCGAAGGTCTGGAAAAATTAGAAAGCCTGGATCTGTCGTTTAATCGCTTCCAAGACTGGAGAGATATACATCCGACCACTTTTCATCCAGCCATTAATTTAAAACGATTAGATTTTTCGAGCAATCCATTACGGACT…	MWLFLIIGALAVAYSIACPDGCSCDLEIIDCMGLDLSNLPEGIDINVTDLDVSWNNFTTIPDQIKQFSELRYFNISHNRISTLMPTDFEGLEKLESLDLSFNRFQDWRDIHPTTFHPAINLKRLDFSSNPLRTINNQSNHLNIKSLLILRLTNCSLKTVPVSVFNRLVNLKELHLSANPITNINESFQLNNLRYIDLSQCLLNYIDENAFADLVSLEVLNLKRNIHLKRFTCHSEYLSQLDLSECVLEKVPSGRLRHVRILDLSMNYIKNIPAKSFLNYHSLELLNMSMNAITSIDSAAFDGLNLIKSIDLSFNKLMILDEKLFYNNTQLISLNLSHNYIRYLNNISSDSLKVLTVSYCEIHEINKYSLIFLPNLIKLFMSRNFISNLPDNLIADNLGV…
Leucine-rich Repeat-containing GPCR - LGR5-like2	MK751530	ATGGCCAGGGTGCGGGTATGGTCGTTCAGGGGCTGGACCTGGGTCATTTGCGTATTAGGATTATGCGCTCTGGCCGCGGCAGACGTTCAACAACAATGTCCTCCACGGTCAGAAATATCACCATGCAGCTGTCAAGTGAAGAAGAACGGTTTGGACATCCTTTGCGAGTTCACCGATCAGCAACACATAACCGAGGCTATGAGTGCCCTCAAAGGCAAGTCCCTGGTCATCTTCTACTTGAAATTGCGGCACAATAACCTGCGCAAACTACCCGGCTTCGTGTTCCTCGGCCTGGACATTCACCATCTCACGATACACAACAGTAGTTTGTCGGTGGTAGAGGAAGCTTCACTTAGTTCGATAGGGAAAATGTTGACGCAGTTGGATGTATCTCAGAAT…	MARVRVWSFRGWTWVICVLGLCALAAADVQQQCPPRSEISPCSCQVKKNGLDILCEFTDQQHITEAMSALKGKSLVIFYLKLRHNNLRKLPGFVFLGLDIHHLTIHNSSLSVVEEASLSSIGKMLTQLDVSQNSLTQVPSAAYKNLHHLLILNMNHNKINSLHAKAFQGLDTLEILTLYENKITSIDPEAFIGLEKKLKRLNLGGNGLTSVPQKSLGILDTLKKLEMQENRISEINEGDFEGLKNLDSLGLAHNKLRNVPSRVFWHLNLLNSLELDGNTIDTIDKDAFAGLEENLQYLRLGDNNIHTIPTEALKRLHRLRHLDLRANNISFIAEDAFAGFGDSITFLNLQKNDIKTLNGMIFENLNSLETLNLQNNKLMHVPEDVMEPILDTLRVVDIM…
Leucine-rich Repeat-containing GPCR - Insulin-like1	MK751531	ATGGCCACCGCGGTTCAGGCCCGGCCGCGGGGGGCCACTCCGGGCTGCGCCATTTACTCCTTCCTCCTGCTTTTCTTATTAAGCTGGTCGGGCCCCACTATCGCTAGTGAACTACTAAATCCCGTCGGTGAAACGTCTATTTGCAAAAGTATCGATATCCGCAACAGATTAGACTCGTTTAAACAACTAGATGGGTGTCAAGTTATTGAAGGATATTTGCAAGTGATTCTATTCGACAATGCAAACGAAACAGAATTTGAAAGTATATCATTTCCCGATCTTGTGGAGATCACCGATTATCTATTGCTGTTCAGAGTTAATGGATTAAAGAGCGTAGGTAGACTGTTTCCCAATTTGTCTGTTATACGCGGCCAGAATTTGGTATCTGAAACAAAAGCC…	MATAVQARPRGATPGCAIYSFLLLFLLSWSGPTIASELLNPVGETSICKSIDIRNRLDSFKQLDGCQVIEGYLQVILFDNANETEFESISFPDLVEITDYLLLFRVNGLKSVGRLFPNLSVIRGQNLVSETKALVIYEMSSLQEIGLHSLTDIMRGGVHIDKNPSLCFIETVDWFRIIQDQSAQNYIKSLKPENECPVCPASVDGRACPKHENSNKYMCWNRDHCQKICSGCGNSTCNSQGKCCSDHCIGGCSEDTSKCHVCRNYVLADENSYSDKCVTKCPKDFYAYLGRRCVTSDYCINIPRPIDYQLTEHNMVERPYKVFNNSCILKCPTNYADDFTNNTCKECDHTCKKECQGARIDSVGLAFKLRGCTHITNSLEIQIRGGNKVVSVLEENLGM…
Leucine-rich Repeat-containing GPCR - Insulin-like2	MK751532	ATGATTTGCGTTTGGGTCGTCTTCATCTACGCGGCGCTGATGTCGCTGACGGGAGCCCAGGAGAAAGAGAAGAAATGCCTCACCACATACCCGGAGGTGAACCCGAAGAAGTATATTCACTACGAAGGAAAGTCACTGGACATTGTGATCGATACGTCTGAAAGGATCACCCATCAGCTGAGCACGTGGGTCTTCTATTATTTCATTAAGGAGATAATAGGCTATAGTAAGGTGAAGATAGTGGAGCAGAGGGACCATTTTGATATAGAGCGATCTATTCAAAAGGTCACGGACATCGCTGAAGATGAACGGGTACCCAAGAGCACCATCAACCTGGAGGTCTGGATACCGCCCGACTACGACACTTACGCTACCGATTTCGTGATCGAATGCGGCAGC…	MRCAGIVVVFGVLVISATTPVSGKICDSIDVRNNITFLNKLRNCTEISGNLQIVLIETTKSVEDYDDYVFPELTRVSGYVLFFKVRHITSIGKLFPNLRVIRGLELIFDYSFILNNLPNLREIGTNKLLYIARGSVHINKTPKLCYAKTIDWQKIGSTTKLDIYQSREDCKPCPEQCNKYCWNSNHCQIQADDCHEECLGCTRNQSNAHCEVCKNYEDDGICVPECPPKKYMLRAMHRCITTDECLALNNHTGKTFANKKWLVYDRECRGNCPANTEYQKESNTCRPCDNFCTKNCTATELNNQNSIANLRGCTHISGSISIVGLNTEEDLRALRESLQSVRYISDYLLIARNKVIRNLDFLSNLRVINGNKKTTNRTLLVYENPSLKRLWHDNVSLKI…
Leucine-rich Repeat-containing GPCR - Insulin-like3	MK751533	ATGATTTGCGTTTGGGTCGTCTTCATCTACGCGGCGCTGATGTCGCTGACGGGAGCCCAGGAGAAAGAGAAGAAATGCCTCACCACATACCCGGAGGTGAACCCGAAGAAGTATATTCACTACGAAGGAAAGTCACTGGACATTGTGATCGATACGTCTGAAAGGATCACCCATCAGCTGAGCACGTGGGTCTTCTATTATTTCATTAAGGAGATAATAGGCTATAGTAAGGTGAAGATAGTGGAGCAGAGGGACCATTTTGATATAGAGCGATCTATTCAAAAGGTCACGGACATCGCTGAAGATGAACGGGTACCCAAGAGCACCATCAACCTGGAGGTCTGGATACCGCCCGACTACGACACTTACGCTACCGATTTCGTGATCGAATGCGGCAGC…	MICVWVVFIYAALMSLTGAQEKEKKCLTTYPEVNPKKYIHYEGKSLDIVIDTSERITHQLSTWVFYYFIKEIIGYSKVKIVEQRDHFDIERSIQKVTDIAEDERVPKSTINLEVWIPPDYDTYATDFVIECGSVSPPGRFGWFIPNELTGPIRDYYNPNKLNDIRSIHWRFFRDEKVVKFFDIDVNQMPLKKYLTAISEENSCPQNICDGTMFTPTYCKSGKQRCGLLLSSNYNSTKFVIKHIKENKLLMRVLFVGDDLASLVIKLKEKYWDRNDVSLVVLSWVPSDVVLYERDFVTVSFENSERLNFTHAIGYKYEMHRLVKVAWSKIENIAKPLYDAVRSFKFETDEYERLLSLYEAKRYINTPKEIACDFLYNNNKTWIKWQKSPESYIYIGGIFP…
Leucine-rich Repeat-containing GPCR - Relaxin 2-like	MK751534	AAATTTAAGATATAATAATATAAAAGAAATAGAAGAAGGATCATTCACATATTTGGGTAAATTAAGACAGCTTGATTTATATGGGAATCAGATAATAGTTTTGGATGCCAATTTGTTCAGTAATCAGAGACATTTAATAAATATGTTCTTGGGTAAAAACCCGCTTGAAAATATACAAAATTCTCTGTTTAAGAACATGCATCAGTTACAAATATTGAACTTGGAAGATGTAGAAATCCCAAATATTAACAATGCTATGTTTGAAAACTTGTTAAATTTGGAGATAGTTTATTTTATGTATTACAGATATTGCCGTTTTATACCTTGGGTTACAATATGTAAACCACCTTCAGATGGTATTTCATCTAACGATCGACTACTTTTCAAACCAATTTTTAG…	NLRYNNIKEIEEGSFTYLGKLRQLDLYGNQIIVLDANLFSNQRHLINMFLGKNPLENIQNSLFKNMHQLQILNLEDVEIPNINNAMFENLLNLEIVYFMYYRYCRFIPWVTICKPPSDGISSNDRLLFKPIFRYSNWIMCFFSLTGNTLVLFSRHLFRDKNKTLSIALKNLAVSDGLMGIYLIIIGYHDLIFRDNYNSIHLEWVSSWRCTLTGMLAMISQEVTVLLLVFMSLDRLFVITSSLKKDRILNVKDTWKVIFSIWCFGIILSATPVIALLSTTRFYGVNSLCLPLFIDDPYFIGWEYSAIIFFGINAPSLIIIIICYCIMFKSIKTTRNNTSMPLKSSEFAVRFFLIILTNIMCWLPIIIAKIVVYFEVEITDHVYGWLAVFILPINSSLNPI…

## Sheet: Supplementary Table 3
Table S3┃Putative Neuropeptides/Neuropeptide-Like Peptides from precursors of red palm weevil.
Neuropeptide	Abbreviation	Peptide Sequence
Allatostatin B	Ast B-1	GWKTDLPMWa
	Ast B-2	AWSNLHSGWa
	Ast B-3	AWQRLQGGWa
	Ast B-4	NWNKFTDGWa
	Ast B-5	SEKWEKFKGSWa
	Ast B-6	EPAWNNLKGLWa
Allatostatin C	Ast C	pQSRYRLCYFNPVSCF
Allatotropin	AT-1	VGDNMELFTARGYa
	AT-2	SSGGCRNCKKEMSLISARRYa
Calcitonin	Cal-1	CLMLGSEDCINSVLRRARAESDFVQNGFTPa
	Cal-2	CVLGDNNCNGDGISGAGSDSDMVNGGFNPa
	Cal-3	CANLGDEGCSNKGIPHARTDSDWVLSGFNPa
	Cal-4	CANFGDEGCSNGGIPGASADSEWLNGGFNPa
	Cal-5	CANFGDEGCSNGGIPGASSDNEWINGGFSPa
	Cal-6	CANFGDEGCSNGGIPGAAVDNEWLNGGFNPa
	Cal-7	CANFGDEGCSNGGIPGAAADSDWLNGGFNPa
Capability/CAP2b	PVK-1	FSDGTIPTKEIRDRDHRTMRVNMRVa
	PVK-2	SSPQFLLNPRVa
	tryptoPK	NDPKATDLWFGPRIa
CCHa	CCHa-1	SCLSYGHACWGGHa
	CCHa-2	GCSNFGHSCFGALa
CNMa	CNMa	YYQIHHTLCHFKICNMa
Diuretic Hormone 31	DH31	GLDLGLGRGFSGSQAAKHLMGLAAANFAGGPGa
Diuretic hormone 44	DH44	QSSRIGEAGGSLSIVNSLDVLRNRLLLEIARKKAKEGANRNRQLLMNLa
Ecdysis triggering hormone	ETH-1	EDPDPFFLTAAKSVPRIa
	ETH-2	SPNRNPSLDFEKFFLKASKSVPRIa
Elevenin	Ele	ACSPLPQCCRRYVHSIGCRGVAA
FMRFa	FMRF-1	SDKFLRFa
	FMRF-2	DSSYIRFa
	FMRF-3	HENFLRFa
	FMRF-4	NSNFMRFa
Glycoprotein hormone alpha 2	GPA2	LIVTQEKALDWNKPGCYKVGHTRKVNIRDCVSFDITTNACRGFCESWAIPSDPQNSQITQPVTSIGTCCNIMETEPIEVRVLCKEGIRTFVFKSAVTCACYHCKKD
Ion transport peptide	ITP-a	SFFDIQCKGVYDKSIFARLDRICEDCYSLFREPQIHSLCM
Ion transport peptide	ITP-b	SFFDIQCKGVYDKSIFARLDRICEDCYSLFREPQIHSLCMKNCFTTDYFKGCLETLQLSDEMEQIQSWIKQVHGAEPVV
ITG-like peptide	ITG-1	WGGLFNRFSPEMLANMGYGGHGGGMSRDGEDNFLEEYGNEVDMEPCY
	ITG-2	CTANEHCCPGSICIDADGVIGSCVYFY
	ITG-3	DSDCESGLVCAESDSGPNARICRPPVHQDKQYSEPCHMSSECDISRGLCCQLQ
	ITG-4	HRQAPRKVCSYFKDPLVCIGPVATDQIKDAVEHTAGE
	ITG-5	ITGLAAFKRPMMH
Myosuppressin	MS-1	pQDVDHVFLRFa
Myosuppressin	MS-2	pQDMDHVFWRFa
Natalisin	NTL-1	SANQEDMGPFWANRa
	NTL-2	DPSYSSDKFMIQEPHWILIKKDPEVEPFFTSRa
	NTL-3	DYVVDGEMDPAFFAARa
Neuroparsin	NP	RSYLWMPCTPCRTMEECDLEPPTPCVWGEARDECGKRICTKGPGERCGGKHNILGKCGEGMMCKSDEKCHGCSLVTLECYN
Neuropeptide F	NPF	APSRDENMFRELMKLDQLYSSIARPRFGa
Neuropeptide-like precursor	NPLP-1	NLESLARGGTWYKNPPLADDY
	NPLP-2	SHYNLLGSPDLPLTTELLANQ
	NPLP-3	SIEALARNGELNHHQNNQDFRTMLGEFND
	NPLP-4	NVASLAKHFNYPRQTIG
	NPLP-5	SISSVAKNGDLPNVYG
	NPLP-6	NIQSLARDGLLGKKFTEFVEAPQD
	NPLP-7	QADYFSNEAVYQMPVDYEDVLQDLEAAEQNIYPLED
	NPLP-8	QADYFSNEAVYQMPVDYEDVLQDLEAAEQNIIRLS
NVP-like	NVP	AHPDHAGSNENVDPVNYFNKHTSAI
Pigment dispersing factor	PDF	NSEVANAMIGSEETQKMYREa
Proctolin	Proc	RYLPTa
Pyrokinin 1	tryptoPK	SDPSINLRKEKQLSPMWFGPRIa
	PK1-1	NQEIKHNNNRNDKDDDNLLDILKESPLVVVAVRDAGKDFTPRLa
	PK1-2	ESGENNPNWFEDGELMESAPISNRASNHFNPRLa
	PK1-3	ESFAQFNPRLa
Pyrokinin 2	tryptoPK	NKEKPVSPMWFGPRIa
	PK2-1	NEDNYRNEKDPDNFLDIDTPFYITAREASSSFIPRMa
	PK2-2	GFTRYFPRLa
RYa	RY-1	KDTHSFRQMIRYa
	RY-2	AGKNDNSGSINVRPRGEVFYLGPRYa
Short neuropeptide F	sNPF	AGRSPQLRLRFa
Sulfakinin	SK-1	QQQPPSDDYGHLRFa
	SK-2	DEQFDDYGHMRFa
Tachykinin-related peptide	TRP-1	VPSGFTGVRa
	TRP-1	APSGFFGMRa
	TRP-2	APMGFVGMRa
	TRP-3	AQMGFFGMRa
	TRP-4	YPYEFRGKFVGVRa
Trissin	Tris	CNSCGSECQSACGTRHFRTCCFNYL
Vasopressin	VPL	CLITNCPRGa

## Sheet: Supplementary Table 4
Table S4┃Neuropeptide genes in the red palm weevil and other Coleopteran beetles. √, identified; ×, not identified.
Neuropeptide	Rhynchophorus	Hylobius	Aethina	Aleochara	Anoplophora	Aquatica	Dendroctonus	Coccinella	Harmonia	Hycleus	Hypothenemus	Ignelater	Leptinotarsa	Nicrophorus	Oryctes	Photinus	Pogonus	Tenebrio	Tribolium
ACP	×	√	√	√	√	×	√	×	×	√	√	×	×	√	√	×	√	√	√
Agatoxin-like	×	×	√	√	√	√	√	√	√	√	√	√	√	√	√	√	√	√	√
AKH	×	√	√	√	√	√	√	√	√	√	√	√	√	√	√	√	√	√	√
Allatotropin	√	√	√	√	√	√	√	√	√	√	√	√	√	√	√	√	√	√	√
Ast B	√	√	√	√	√	√	√	√	√	√	√	√	√	√	√	√	√	√	√
Ast C	√	√	×	×	×	×	√	√	√	×	×	×	×	×	×	×	×	×	×
Ast CC	√	√	√	√	√	√	√	√	√	√	√	√	√	√	√	√	√	√	√
Ast CCC	×	×	√	√	√	√	×	×	√	√	√	√	√	√	√	√	√	√	√
Baratin (NVP-like)	√	√	√	√	√	√	√	√	√	√	√	√	√	√	√	√	√	√	√
Bursicon A	√	√	√	√	√	√	√	√	√	√	√	√	√	√	√	√	√	√	√
Bursicon B	×	√	√	√	√	√	√	√	√	√	√	√	√	√	√	√	√	√	√
Calcitonin	√	√	√	√	√	√	√	√	√	√	√	√	√	√	√	√	√	√	√
CCAP	×	√	√	√	√	√	√	√	√	√	√	√	√	√	√	√	√	√	√
CCHamide 1	√	√	√	√	√	√	√	√	√	√	√	√	√	√	√	√	√	√	√
CCHamide 2	√	√	√	√	√	√	√	√	√	√	√	√	√	√	√	√	√	√	√
CNMamide	√	√	√	√	√	√	√	√	√	√	√	√	√	√	√	√	√	√	√
DH31	√	√	√	√	√	√	√	√	√	√	√	√	√	√	√	√	√	√	√
DH47	√	√	√	√	√	√	√	√	√	√	√	√	√	√	√	√	√	√	√
Elevenin	√	√	√	×	√	√	√	×	×	√	√	√	×	√	√	√	×	√	√
EH	√	√	√	√	√	√	√	√	√	√	√	√	√	√	√	√	√	√	√
ETH	√	√	√	√	√	√	√	√	√	√	√	√	√	√	√	√	√	√	√
FMRFamide	√	√	√	√	√	√	√	√	√	√	√	√	√	√	√	√	√	√	√
GPA2	√	√	√	√	√	√	√	√	√	√	√	√	√	√	√	√	√	√	√
GPB5	√	√	√	√	√	√	√	√	√	√	√	√	√	√	√	√	√	√	√
Hansolin	×	×	√	√	√	√	√	√	√	√	√	√	√	√	√	√	√	√	√
Insulin 1	√	√	√	√	√	√	√	√	√	√	√	√	√	√	√	√	√	√	√
ITG	√	√	√	√	√	√	√	√	√	√	√	√	√	√	√	√	√	√	√
ITP A	√	√	√	√	√	√	√	√	√	√	√	√	√	√	√	√	√	√	√
ITP B	√	√	√	√	√	√	√	√	√	√	√	√	√	√	√	√	√	√	√
Myosuppressin	√	√	√	√	√	√	√	√	√	√	√	√	√	√	√	√	√	√	√
Natalisin	√	√	√	√	√	√	√	√	√	×	×	√	√	√	√	√	√	√	√
Neuroparsin	√	√	√	√	√	√	√	√	√	√	√	√	√	√	√	√	√	√	√
NPF	√	√	√	√	√	√	√	√	√	√	√	√	√	√	×	√	√	√	√
NPLP	√	√	√	√	√	√	√	√	√	√	√	√	√	√	√	√	√	√	√
Orcokinin A	×	×	√	√	√	√	√	√	√	√	√	√	√	√	√	√	√	√	√
Orcokinin B	√	√	√	√	√	√	√	√	√	√	√	√	√	√	√	√	√	√	√
PDF	√	√	√	√	√	√	√	√	√	√	√	√	√	√	√	√	√	√	√
Periviscerokinin (Capa)	√	√	√	√	√	√	√	√	√	√	√	√	√	√	√	√	√	√	√
Proctolin	√	√	√	√	√	√	√	√	√	√	√	√	√	√	√	√	×	√	√
PTTH	√	√	√	√	√	√	√	√	√	√	√	√	√	√	√	√	√	√	√
Pyrokinin	√	√	√	√	√	√	√	√	√	√	√	√	√	√	√	√	√	√	√
Relaxin	×	×	√	√	√	√	×	√	√	√	√	√	√	√	√	√	√	√	√
RFLamide	×	×	√	√	√	√	×	√	√	√	√	√	√	√	√	√	√	√	√
Ryamide	√	√	√	√	√	√	√	√	√	√	√	√	√	√	√	√	√	√	√
SIFamide	√	√	√	√	√	√	√	√	√	√	√	√	√	√	√	√	√	√	√
sNPF	√	√	√	√	√	×	√	√	√	√	√	√	√	√	√	√	√	√	√
Sulfakinin	√	√	√	√	√	√	√	√	√	√	√	√	√	√	√	√	√	√	√
Tachykinin	√	√	√	√	√	√	√	√	√	√	√	√	√	√	√	√	√	√	√
Trissin	√	√	√	√	√	√	√	√	√	√	√	√	√	√	√	√	√	√	√
Vasopressin	√	√	√	√	√	√	√	√	√	√	√	√	√	√	√	√	√	√	√

## Sheet: Supplementary Table 5
Table S5┃Primers of candidate neuropeptide precursors and receptors in used for RT-qPCR.
Gene	Forward primer（5’-3’）	Reverse primer（5’-3’）
MK751489	GATCGCAGGGAGAGGCTTAT	AGCAGAAAATGATGACGGCC
MK751490	TTCTCCAAGATGCAGACGGT	TGGTGGAGATCATGTAGGCC
MK751491	TGGTACTGGGGTTCTTCGTC	AGAGGATGGGGTTGAGTGTG
MK751492	CCGGAGAAATGCAGGGAATG	CAGTTCTTGGGACCTCTCGT
MK751493	AACGGGTCCAGCATTGATTC	AGACCAACGGAGAGATCTGC
MK751494	GCATCAGTCCTCACCATCCT	TGGTCCCGTCGTAGTAATCG
MK751495	CCTCTCAGAGCCAGATCGTT	CCCGAAAATCCGACTGCATT
MK751496	ATCCAAACAAGCCCCGTCTA	GGGACCTGCGTATGTGACTA
MK751497	CCAACCCCATTCTTTACGGC	GTTGGTAATCGGTTGCTGCA
MK751498	CATCATCGCCGAATAGCAGG	GGCATCGTTCAGTTTGTGGA
MK751499	ACACCCACTTCTCCATCTGG	GCTGCTGGACCTTCTCTTTG
MK751500	ACAGCAACGAAGAAGCCAAG	GCCAGGTGATGAAGTTGGTC
MK751501	TGGTTGCCATCACCCTCAAT	TCCCCAAGCTCCGGTTAAG
MK751502	GATTCCGACACTGCGATACG	TGCCAAGTCTCTCGTCCATT
MK751503	CTGGTGGTGGTACTGGTGAT	TCGAGTTAGTCATGGCACGT
MK751504	CAACCCTCTTGAAGAACGGC	CGTTCTGATTCTGGCTGACG
MK751505	CGCGTACACCACTGACAATT	AAGTCCCGAAATCAGCAGGA
MK751506	TGGACTATGGGCTTGACGTT	AGACTTTGCTTGCCTCAACG
MK751507	GGTTGATCCGAACGCTCTTC	CCTTCCCAGTCAGCCCAATA
MK751508	CGACCCGTTACAGTTAAGCG	CTGGATGGTGTTGGGTTTGG
MK751509	CGACGAAGATGCTGGTTGTT	AACCTCTCGGAACTTCTGGG
MK751512	GCCCTAGTCACCTTGAACCT	AACACGCTCACCACCACTAT
MK751513	TCCCCTGAACGTCATCAACA	ACTTGCTTGAACTCCTTGCG
MK751514	ATTCGTCATTTCCTGGCTGC	GCGAAACCCTTCCGAAACTT
MK751515	AAAATGCTCCCCTGGTACGA	ACGCCCAACAGAAGATCAGA
MK751516	TTCTCGTGTTTGCCATTCGT	GCAGGTGTTTGTAGACGACG
MK751517	ATTGTGGCAATACTGGTCGC	CCCTTCTTATTGTCGCACGG
MK751518	AACTCCCAAACAACAGCTGC	GTACTGCCACATCTTGCGAG
MK751519	GGTTTTCTCCTCTGCAAGCC	ACAGTCACTTGGGGTATGCA
MK751520	AATCACCCACCAACGCAATC	TAATAAAGTCCCAGCCGCCA
MK751521	TCAGCTCTTCGACGAACTCA	CTATCAACGGCCCAGCAATC
MK751522	GATCTACGTCCCAGTCCGAG	CCTTGACCATCATTCGCAGG
MK751523	CGTGTTCCTCGTTACCCTTC	GATCTGGTGGTGGCGGTATA
MK751524	AGACAGCCTGGAAATTCGGA	TACAACACGTCACGCAACTC
MK751525	CTGTTTGTAGAAGGAGCCGC	CGTGACCCATCCCAAGAAAC
MK751526	ACCTCTACGCTCTGATGACG	TGTTTGTGGAAGCCGAACTG
MK751527	TGGAGCAGCAACAAAACTTCT	TGGTCATCGGGCTAGAAACA
MK751528	CACTGCGTTTACTGGATCCG	GAATTCTTGGTGGGTCGCTG
MK751529	GCTCAGACGAATGCAAGAGG	TCCGGATTACTGCCTCTGAC
MK751530	AAGATCAACAGTCTGCACGC	GAAGTGAGTCCATTGCCACC
MK751531	GAAGCTGTGCCAACTCCTTT	ACGTACATCAGGCGGTAGAG
MK751532	CCCGTAGAGTGTCCAAACCT	GAGAGCTGGCGGGTTATTTG
MK751533	ACACGGCAGATGGGGAATTA	ACTTCTTCCACGACCTCCAG
MK751534	GCAGTTAGTGATGGTCTTATGGG	GCAACACCGTAACTTCTTGAGA
MK751535	CAACGATTACAGGGTGGCTG	GGTTCTCGTTTACCCCAGGA
MK751536	CCACCTCACTTTGCCGAAAA	TTCCATATTCCTGTCCGGCC
MK751537	AGGACCCGGACTATCAAACG	AAGTCGTCCTTTAACAGCGC
MK751538	ACCCAGAGCTACCAGAGTTG	CGTCGTCAAGAGTTAACACGT
MK751539	TGTGCTGTCAAGAATCGGGA	CCTTCATCAGCATAACCGGC
MK751540	TGGTTTTACTCCGGGGAAGA	GCTATCAGTTCGGGCATGTG
MK751541	CGTGGTGGTGTTTCTTGCTT	TTCGTCCTCCTCATATCCGC
MK751542	AGCTCTCTCACCGCAATCTT	CCACTTCTTTTCCCATGGCC
MK751543	ATTCCTGTTTCGGGGCATTG	GGTTCTTCCTGCTTTCGGTT
MK751544	CTTGAACAGTGACCAAAGGCA	TATCGTTTTCCCCTTCGGCT
MK751545	GGCAAGTTATTCCGGCTACT	GAATCCTCGGCCTAATCCCA
MK751546	CAGTTCCTACATCCGCTCGA	TACGCTCTCTTGCCCAGATT
MK751547	CCTCCAAATCCGTACCCAGA	CGATCGCTCAAAAGGTCCTG
MK751548	TCAGTGTAAGCAGATGTATGGAC	CCTATAGTACCGGGATTATTGCA
MK751549	ATAAAGACACCGCATCCCCT	CGGCAACATTGAGGAAGAGG
MK751550	ACCCCGTAGCGACAAATTCT	CGGATGTAGCTGGAGTCTCT
MK751552	GGGATTTTGCGAGAGTTGGG	GGACTTGAAGACGAAGGTGC
MK751553	GGTGTCCCAGTTCGATCAGA	CTTCTTCGCAGTTTCGCAGA
MK751554	GATGCTCTCTTGTCACGGGA	CGGTTATTTGGAGTCTGCCG
MK751555	GTGAGCGTGGTGTCGAAAG	GAGTGAATCTGTGGCTCCCT
MK751556	ACTAACCCACCACCTAACCA	GGCAGCCCTTGAAATAGTCTG
MK751557	CGAACCTTGCCACATGTCAA	TCATTGGACGTTTGAAGGCG
MK751558	AGTGATTAGCTGTCCACCCA	ACGTGGTCAACATCCTGTCT
MK751559	GTCGGTCTTCTTGGCTTGTC	TCCGAATCTCCAGAAAACGTG
MK751560	TAGCTCTTGTCCACTGCCAA	TTTTACCCCTGTTCGCCCA
MK751561	TGCCCTTGAGATACGAAGCT	CTCTCACCAGGTCCCTTTGT
MK751562	TGTTGGGAACGAATGTCAGC	CTAGGTCTTGACTTGTGCGC
MK751563	GCCAGGGATGGACTCTTAGG	GCAGCTTCCAGGTCTTGTAG
MK751565	AACCGTACAGCCAGTTCAGA	CAACTCCATAACCCTTGCCG
MK751566	GGGGAATCTTGGCTTCTCGT	TGTTGTCAATTGCTCGGGAA
MK751567	TGTATCATGGTCGCCGTCTT	AGTACACCTTGCTCTCTGGC
MK751568	TTGAACGATGCCAACCGAAG	TGCAAGTACATCCTACGACCA
MK751569	TCGGCAGGAGAAAACGAAAC	CGCCATCCTCGAACCAATTT
MK751570	AAGGATAGGCAGGAGGAAGC	GAAATCCCGATTGTCCAGCC
MK751571	TGTTGCATGTTATGTTCACGC	CCTGTACCGTTGAGTCCAGT
MK751572	TCAGGGAGTTGGTCGAGATG	GCCGAAACAGGGTATGCATT
MK751573	TGAACGCAACTTGAACCGAA	TGGCCGTAATCATCAGAGGG
MK751574	AACCAACCAACATTCAGCGG	TGCCCCTTACTCCAACGAAT
MK751575	ACTTGTAATTCGTGCGGCTC	TTCTTGCGAAACGGTCCTTG
MK751576	CGATGTGCATTGGACGGAAT	CATCAGCAGCGTATCCCAAC
GAPDH	CCAAGGGAGCCAAGCAATT	CGCTGATGCCCCTATGTATGT
tubulin	GCTACCTTCATCGGCAACTC	CGGTGGCTTCTTGGTATTGT
